1 **Transient DNA Binding Induces RNA Polymerase II Compartmentalization During**  
2 **Herpesviral Infection Distinct From Phase Separation**

3  
4 David T McSwiggen<sup>1,2</sup>, Anders S Hansen<sup>1,2</sup>, Hervé Marie-Nelly<sup>1,2</sup>, Sheila Teves<sup>1,3</sup>, Alec B  
5 Heckert<sup>1,2</sup>, Claire Dugast-Darzacq<sup>1,2</sup>, Yvonne Hao<sup>1</sup>, Kayla K Umemoto<sup>1</sup>, Robert Tjian<sup>1,4,\*</sup>,  
6 Xavier Darzacq<sup>1,2,\*</sup>

7  
8 <sup>1</sup>Department of Molecular and Cell Biology, University of California Berkeley, CA, USA, 94720

9 <sup>2</sup>California Institute of Regenerative Medicine Center of Excellence, University of California  
10 Berkeley, CA, USA, 94720

11 <sup>3</sup>Department of Biochemistry and Molecular Biology, University of British Columbia,  
12 Vancouver, BC, Canada, BC V6T 1Z4

13 <sup>4</sup>Howard Hughes Medical Institute, University of California Berkeley, CA, USA, 94720

14

15 \*To whom correspondence should be addressed:

16 Robert Tjian, [jmlim@berkeley.edu](mailto:jmlim@berkeley.edu)

17 Xavier Darzacq, [darzacq@berkeley.edu](mailto:darzacq@berkeley.edu)

18

19        **Summary**

20        During lytic infection, Herpes Simplex Virus 1 generates replication compartments (RCs) in  
21 host nuclei that efficiently recruit protein factors, including host RNA Polymerase II (Pol II). Pol  
22 II and other cellular factors form hubs in uninfected cells that are proposed to phase separate via  
23 multivalent protein-protein interactions mediated by their intrinsically disordered regions. Using  
24 a battery of live cell microscopic techniques, we show that although RCs superficially exhibit  
25 many characteristics of phase separation, the recruitment of Pol II instead derives from  
26 nonspecific interactions with the viral DNA. We find that the viral genome remains nucleosome-  
27 free, profoundly affecting the way Pol II explores RCs by causing it to repetitively visit nearby  
28 binding sites, thereby creating local Pol II accumulations. This mechanism, distinct from phase  
29 separation, allows viral DNA to outcompete host DNA for cellular proteins. Our work provides  
30 new insights into the strategies used to create local molecular hubs in cells.

31

32        **Article Keywords:** Transcription, Phase Separation, Nuclear Organization, Single Particle  
33 Tracking, RNA Polymerase II, Herpesvirus, Microscopy

34

## 35 Introduction

36 The ability to control the local concentration of molecules within cells is fundamental to  
37 living organisms. A classic example is the use of electrochemical gradients across membranes to  
38 facilitate cellular work. In recent years, our understanding of the forces driving the formation of  
39 sub-nuclear compartments has undergone a paradigm shift. A number of studies suggest that  
40 many proteins have the ability to spontaneously form separated liquid phases *in vitro* (Hyman et  
41 al., 2014), and recent work highlights the possibility that similar liquid compartments may occur  
42 *in vivo* (Shin et al., 2017; Strom et al., 2017). Such liquid-liquid demixing has been proposed to  
43 be a common mechanism to sequester specific macromolecules within a compartment, or to  
44 increase their local concentration to facilitate chemical interactions. Formation of these structures  
45 is thought to be predominantly driven by weak, multivalent protein:protein interactions mediated  
46 by intrinsically disordered regions (IDRs), which are often comprised of low complexity  
47 polypeptides, and sometimes aided by the presence of modular RNA or DNA binding motifs  
48 (Banani et al., 2017; Hyman et al., 2014).

49 These observations have opened new frontiers of inquiry in cell biology, and generated a  
50 deeper appreciation for the diversity of mechanisms that a cell may deploy to locally concentrate  
51 certain molecular components. The list of proteins—particularly nuclear proteins—that can  
52 undergo phase separation *in vitro* continues to grow (Courchaine et al., 2016). For example,  
53 recent studies of RNA Polymerase II (Pol II) and its regulators have shown that Pol II forms  
54 dynamic hubs whose size are dependent on the number of intrinsically disordered heptad peptide  
55 repeats contained within the C-terminal domain (CTD) (Boehning et al., 2018), and that various  
56 CTD interacting factors may form phase separated droplets *in vitro* (Lu et al., 2018). Even so, it  
57 remains unclear which molecular interactions drive the formation of domains via liquid-liquid  
58 phase separation (LLPS), or many different classes of interactions mediate such local molecular  
59 behavior (Chong et al., 2018). Importantly, we do not we fully understand the nature of the  
60 molecular forces that drive compartmentalization *in vivo*, still lack compelling evidence to  
61 establish the functional consequences of these compartments for the biological activities of their  
62 constituents.

63 Herpes Simplex Virus type 1 (HSV1) provides an attractive system to study this question  
64 because of its ability to form compartments in the nucleus of infected cells *de novo*. HSV1 is a  
65 common human pathogen that hijacks its host's transcription machinery during lytic infection  
66 (Rice et al., 1994). Transcription of HSV1 genes occurs in three waves: immediate early, early,  
67 and late, with the latter strictly occurring only after the onset of viral DNA replication (Knipe  
68 and Cliffe, 2008). Like many DNA viruses, HSV1 creates subcellular structures called  
69 replication compartments (RC) where both viral and host factors congregate to direct replication  
70 of the viral genome, continue viral transcription, and assemble new virions (Schmid et al., 2014).  
71 Recent reports highlight the ability of HSV1 to usurp host Pol II to transcribe its own genome  
72 such that, once late gene transcription commences, the host chromatin is largely devoid of  
73 productively transcribing Pol II, and the majority of newly synthesized mRNAs are viral in  
74 origin (Abrisch et al., 2015; Rutkowski et al., 2015). Consistent with genomic data,  
75 immunofluorescence staining of infected cells shows a dramatic enrichment of Pol II and other  
76 nuclear factors in RCs (Rice et al., 1994).

77 Given this shift in both the sub-nuclear localization of Pol II upon infection, and its effect on  
78 the transcriptional output of an infected cell, we chose to examine the mechanism of Pol II  
79 recruitment to HSV1 RCs as a model case for the generation of new subcellular compartments.  
80 We employed a combination of imaging approaches, including live cell single particle tracking

81 (SPT), fluorescence loss in photobleaching (FLIP), and fluorescence recovery after  
82 photobleaching (FRAP), in addition to single molecule localization microscopy to probe Pol II  
83 localization and behavior within RCs. We complemented these imaging assays with genetic and  
84 chemical perturbation experiments while measuring Pol II behavior in infected and uninfected  
85 cells. Finally, we performed ATAC-seq to sample the chromatin state of the viral DNA, and used  
86 Oligopaints to estimate the number of viral genomes within the RCs of infected cells.

87 Despite initial experiments showing that RCs display many of the macroscopic hallmarks of  
88 LLPS, we unexpectedly found that recruitment of Pol II and other DNA-binding proteins to RCs  
89 is achieved through a distinct compartmentalization mechanism not driven by IDR-dependent  
90 protein:protein interactions. Rather, we find that Pol II recruitment is achieved predominantly  
91 through transient, nonspecific binding of Pol II to viral DNA. These interactions occur  
92 independent of transcription initiation, and rely on the unusual feature of the HSV1 genome that  
93 it is largely maintained as “naked”, nucleosome-free DNA, which is much more accessible to  
94 DNA-binding proteins than host chromatin. Our findings show that nonspecific binding can play  
95 a key role in RC formation, in Pol II recruitment during infection, and more generally in the  
96 repertoire of distinct mechanisms a cell might employ to generate nuclear compartments.

## 97 **Results**

### 98 **Pol II recruitment to Replication Compartments exhibits hallmarks of liquid-liquid** 99 **demixing**

100 HSV1 RCs form *de novo* following lytic infection, making them an attractive system to  
101 dissect compartment formation at the molecular level. To determine the mechanisms leading to  
102 the hijacking of Pol II, we used a U2OS cell line in which the catalytic subunit of Pol II has been  
103 fused to HaloTag (Boehning et al., 2018; Los et al., 2008). HSV1 infection occurs rapidly, with  
104 large replication compartments (RCs) forming within a few hours (Figure 1A). Because we were  
105 most interested in the early stages of lytic infection when Pol II is actively recruited to the RC,  
106 we focused our experiments on the period between 3 hours post infection (hpi) when RCs begin  
107 to emerge, and 6 hpi when infected cells begin to display significant cytopathic effects (Movies  
108 S1 and S2). To capture the earliest stages of Pol II recruitment, we used a low multiplicity of  
109 infection (MOI) to obtain a minimal dose of virions per cell.

110 In addition to Pol II, many other viral and nuclear factors re-localize to RCs (Dembowski and  
111 DeLuca, 2015). In fact, this redistribution of proteins is so dramatic that it can be seen by phase  
112 contrast microscopy as a change in the refractive index of RCs (Figure 1A). We observed, in  
113 agreement with previous studies, that RCs grow and move over the course of infection (Figure  
114 1B) (Chang et al., 2011; Taylor et al., 2003). We also found that RCs exhibit several other  
115 behaviors characteristic of liquid droplets, such as an ability to fuse (Figure 1B, Movies S1 and  
116 S2) and a spherical shape, as indicated by an aspect ratio close to one (Figure 1C, median 1.18,  $n$   
117 = 817). RCs are particularly round early in infection, when they are small (Figure S1). Such  
118 behaviors closely mimic the behavior of phase-separated liquid droplets, where the interface is  
119 thought to be subject to surface tension (Brangwynne et al., 2011; Feric et al., 2016).

120 Because LLPS is thought to be mostly driven by weak protein:protein interactions between  
121 intrinsically disordered regions (IDRs), we used the protein disordered region prediction  
122 algorithm IUPred to predict IDRs within viral proteins (IUPred > 0.55) (Dosztanyi et al., 2005;  
123 Dosztányi et al., 2005), and found these predictions match well with known disordered regions  
124 (Figure 1D) (Everett, 2000; Hew et al., 2015; Pfoh et al., 2015; Tunnicliffe et al., 2015). Across



125 all viral proteins, we identified predicted IDRs longer than 10 amino acids, and used these to  
126 estimate what fraction of each protein sequence is unstructured (Figure 1E, Table S1). When  
127 categorized by temporal class, we noted that the immediate early (IE) and viral tegument  
128 proteins—the two groups that are presented to the cell first upon infection—had the highest  
129 fraction of predicted intrinsic disorder. In fact, when compared to a list of proteins known to  
130 undergo LLPS *in vitro*, the IE and tegument proteins are slightly more disordered (Figure 1E;  
131 Table S2 and citations within). Under the working hypothesis that multivalent interactions  
132 between protein IDRs drive phase separation, the similarity in predicted disorder profiles  
133 between this curated list and the IE and tegument proteins suggests that IDRs in viral proteins are  
134 as likely to drive LLPS as experimentally validated proteins.

135 Based on the above descriptive observations, we hypothesized that Pol II is recruited to RCs  
136 through interactions between its CTD and other IDR-containing proteins within the RC. To test  
137 this, we measured the FRAP dynamics of Pol II in RCs. We saw a consistent slowing of recovery  
138 as infection progressed and RCs got larger (Figure 1F), which could be interpreted as evidence  
139 that RCs act as a separate liquid phase that incorporates Pol II and sequesters it from the rest of  
140 the nucleoplasm. Subsequent experiments to directly test this hypothesis, however, cast doubt on  
141 this interpretation.

142 We recently reported that hub formation by Pol II in uninfected cells occurs in a manner  
143 dependent on the length of the Pol II CTD (Boehning et al., 2018). To test whether the Pol II  
144 CTD likewise mediates interaction with RCs, we compared Pol II accumulation in RCs in cells  
145 with the wild-type Pol II CTD (with 52 heptad repeats) and cell lines bearing truncated (25  
146 repeats) or extended (70 repeats) CTDs. To our surprise, the length of the CTD had no detectable  
147 effect on its incorporation into RCs (Figure 1G), suggesting that Pol II does not require IDR  
148 interactions through its CTD to become enriched.

149 As a further test of the role of IDR interactions in Pol II accumulation in RCs, we treated  
150 cells with 1,6-hexanediol, which disrupts weak hydrophobic interactions between IDRs that  
151 drive LLPS (Boehning et al., 2018; Chong et al., 2018; Lin et al., 2016; Lu et al., 2018; Strom et  
152 al., 2017). We infected cells for five hours, and then subjected them to treatment with a high  
153 concentration (10% v/v) of 1,6-hexanediol for one, five, or ten minutes. Five minutes after  
154 treatment, the morphology of the nucleus began to change, and by ten minutes it was noticeably  
155 deformed, consistent with widespread disruption of cellular organization by 1,6-hexanediol (Lin  
156 et al., 2016). Nonetheless, Pol II remained highly enriched in RCs after 1,6-hexanediol treatment  
157 (Figure 1H), implying that formation of RCs does not require interactions between IDRs of Pol II  
158 and viral proteins.

### 159 **Pol II diffusion within and across RC boundaries is inconsistent with an LLPS model**

160 The data outlined in Figure 1 present a potential contradiction, as RCs exhibit several  
161 properties commonly associated with phase separation *in vitro*, yet Pol II recruitment to RCs was  
162 not susceptible to disruption by 1,6-hexanediol or dependent on CTD length. Given these results,  
163 we sought to better understand the mechanism driving the enrichment of Pol II in RCs by  
164 measuring the behavior of individual Pol II molecules. To accurately capture both immobile and  
165 freely diffusing Pol II molecules, we used stroboscopic photo-activatable single particle tracking  
166 (spaSPT) to visualize and track molecules (Figure 2A) (Hansen et al., 2017, 2018). We labeled  
167 HaloTag-Pol II with equal amounts of JF<sub>549</sub> and PA-JF<sub>646</sub> (Grimm et al., 2015, 2016), which  
168 allowed us to monitor its overall distribution using the former dye while tracking individual  
169 molecules using the latter dye. We generated masks of the location of the nuclear periphery and

170 individual RCs and used these masks to sort trajectories as either “inside” or “outside” of RCs  
171 (Figure 2B).

172 Quantitative measurements can be made by building histograms of all the displacement  
173 distances from the trajectories and fitting to a two-state model in which Pol II can either be freely  
174 diffusing (“free”), or immobile and hence presumably bound to DNA (“bound”) (Figure 2C).  
175 Such a two-state model gives two important pieces of information: the fraction of “bound” and  
176 “free” molecules, and the apparent diffusion coefficient of each population (Hansen et al., 2018).  
177 It is important to note that, because this modeling approach takes the aggregate of many  
178 thousands of molecules, these data cannot measure how long a particular molecule remains  
179 bound in a given binding event. Here, “bound” refers to both specific DNA binding events—e.g.  
180 molecules assembled at a promoter or engaged in mRNA elongation—as well as transient,  
181 nonspecific binding interactions.

182 The difference in the behavior of Pol II inside of RCs compared with the rest of the  
183 nucleoplasm is immediately apparent from examining the lengths of jumps between consecutive  
184 frames (Figure 2D). Fitting a two-state model to the data, we were surprised to find that the mean  
185 apparent diffusion coefficient of the free population was unchanged between trajectories inside  
186 of RCs compared with those outside RCs or in uninfected cells. If RCs were a *bona fide* separate  
187 phase, one would expect differences in molecular crowding or intermolecular interactions to  
188 predominantly affect free diffusion, resulting in substantially different diffusion coefficients  
189 between the populations (Bergeron-Sandoval et al., 2016). Furthermore, the similarity in  
190 diffusion coefficients between infected and uninfected cells argues against a separate viral  
191 protein-Pol II complex responsible for recruitment to RCs.

192 We verified this result in two ways: First, we performed a fluorescence loss in  
193 photobleaching (FLIP) experiment, in which a strong bleaching laser targets the inside of an RC  
194 and loss of fluorescence elsewhere in the nucleus is measured to quantify exchange of Pol II  
195 between the nucleoplasm and the RC. Consistent with the spaSPT data, we see that Pol II  
196 molecules exchange between RCs and the rest of the nucleoplasm as fast, if not faster, than Pol II  
197 in an uninfected cell (Figure 2F). Similar results were obtained by using Pol II tagged with the  
198 photo-convertible fluorescent protein Dendra2 (Cisse et al., 2013) and photo-converting, rather  
199 than bleaching, molecules in the RC (Figure S2). Thus, Pol II molecules diffuse out of the RC,  
200 rather than remaining sequestered within a single compartment. Second, a liquid-liquid phase  
201 separation model predicts that a diffusing Pol II molecule within an RC will be more likely to  
202 remain within the RC than to exit the RC when it reaches the compartment boundary. To test this  
203 prediction, we examined all trajectories for events in which a molecule crosses from inside of the  
204 RC to outside, or vice versa, to look for evidence of such a constraint. Comparing the  
205 distribution of displacements for a particle going from inside the RC to outside, we see no  
206 difference in the distribution of displacements, either entering or leaving RCs, when compared to  
207 uninfected cells in which mock RC annotations were randomly imposed *in silico* (Figure 2G,  
208 Figure S3). With these experiments we cannot detect any evidence of a boundary for molecules  
209 entering or leaving RCs, further arguing that this compartment does not consist of a distinct  
210 liquid phase.

211 While the two-state model shows no change in diffusion coefficient of molecules inside  
212 versus outside RCs, the fraction of molecules in the “bound” state nearly doubles inside RCs,  
213 reaching ~70% (Figure 2H). The diffusion coefficients we measured with the bound populations  
214 are still consistent with those of chromatin (Hansen et al., 2018), indicative that these  
215 populations reflect DNA binding (Figure S4). The increase in the fraction of bound molecules is

216 further supported by the FRAP data (Figure 1F). We verified this was not an artifact of the  
217 masking process by using the same process of artificially imposing RCs randomly *in silico*  
218 (Figure S3), and we found no difference in the fraction of bound molecules. Such a significant  
219 shift in the relative populations of bound and free molecules inside RCs, taken together with the  
220 previous data, shows that the mechanism driving Pol II recruitment to RCs is dominated by DNA  
221 binding, rather than by IDR-mediated interactions that sequester Pol II away in a separate liquid  
222 phase.

### 223 **Pol II recruitment to RCs occurs independent of transcription initiation**

224 The above data argue against formation of RCs by LLPS, suggesting that some other  
225 mechanism must explain the doubling of DNA-bound Pol II in RCs. One possibility is that  
226 increased recruitment of Pol II is explained by high levels of active transcription within RCs.  
227 Multiple lines of evidence suggest that transcription derived from the viral genome is activated to  
228 a much greater extent than even the most highly transcribed host mRNA (Rutkowski et al., 2015)  
229 and so an enriched population of actively elongating Pol II would be expected to increase the  
230 “bound” population.

231 To test whether active transcription is necessary for Pol II recruitment to RCs, we treated  
232 infected cells with either Flavopiridol or Triptolide, two small molecules that selectively inhibit  
233 different stages of transcription initiation (Figure 3A). Flavopiridol is a potent inhibitor of CDK9  
234 that prevents the phosphorylation of serine-2 of the RPB1 CTD heptad, and thus prevents  
235 transcription from proceeding beyond ~50 nucleotides downstream of the transcription start site  
236 (TSS) (Chao and Price, 2001; Jonkers et al., 2014). Triptolide, on the other hand, is an inhibitor  
237 of the ATPase domain of TFIIH, preventing the stable engagement of Pol II at the Pre-Initiation  
238 Complex (PIC) (Alekseev et al., 2017; Chen et al., 2015; Titov et al., 2011). Samples treated  
239 with Triptolide show a loss of engaged Pol II at promoters (Jonkers et al., 2014; Shao and  
240 Zeitlinger, 2017).

241 HSV1 RCs require the expression of immediate-early and early genes to generate the DNA  
242 replication machinery, so we allowed the infection to progress for four hours before treating with  
243 either compound. Cells at this timepoint have well formed RCs, and Pol II binding is already  
244 greatly increased (Figure 2H). We treated these cells with 1  $\mu$ M Flavopiridol or 1  $\mu$ M Triptolide  
245 for 15, 30, or 45 minutes to allow any elongating polymerases to finish transcribing (Figure 3B).  
246 After treatment, we fixed cells, and we performed RNA fluorescence in situ hybridization  
247 (FISH) using a probe against an intronic region to detect nascent transcripts and, in parallel, and  
248 immunofluorescence to mark the DNA-binding protein ICP8, a common marker for RCs (Taylor  
249 et al., 2003). After 30 minutes of drug treatment, transcription is significantly reduced (Figure  
250 S5). Remarkably, even after 45 minutes of treatment, ~80% of the Pol II signal remains within  
251 RCs (Figure 3C, Figure S5). These data suggest that the recruitment of Pol II to RCs occurs  
252 largely independently of transcription, or even stable engagement with gene promoters.

253 We next tested whether treatment with these transcription inhibitors would change the bound  
254 fraction measured by spaSPT. In uninfected cells, Triptolide or Flavopiridol treatment both  
255 reduce the fraction of bound Pol II by half, to ~15% (Figure 3D), similar to what others have  
256 reported (Boehning et al., 2018; Teves et al., 2018). Surprisingly, inhibition of transcription with  
257 Flavopiridol reduced the bound fraction inside of RCs by only ~5% (Figure 3D). Even treatment  
258 with Triptolide, which prevents stable engagement with TSS-proximal DNA only reduced the  
259 fraction bound by ~12% (Figure 3D). We were surprised to see that with either drug treatment,  
260 HSV1 infection appears to also confer some resistance to the effects of the drugs on Pol II  
261 binding to host chromatin, despite the fact that these concentrations of transcription inhibitors are

262 sufficient to prevent new transcription (Figure 3D, Figure S5). Given the inherent limitation of  
263 spaSPT for inferring the length of binding events, we wanted to confirm that drug treatment  
264 prevented stable Pol II binding. Indeed, FRAP experiments in infected cells treated with  
265 Triptolide show a dramatically faster recovery rate (Figure 2E). For the infected samples, this  
266 means that the “bound” molecules measured by SPT do not remain bound for long times, as one  
267 would expect from high affinity protein-protein or protein-DNA interactions at cognate sites.  
268 Instead, these binding events are likely short compared to the timescales of PIC assembly and  
269 transcription initiation. Such highly transient binding events also argue against sequence specific,  
270 high affinity interactions as drivers for sequestering Pol II to the RC. The fact that infected cells  
271 show resistance, in terms of DNA binding, to the drug treatment may be a result of other viral  
272 mechanisms that occur during infection, such as aberrant Pol II CTD phosphorylation (Rice et  
273 al., 1994) or termination defects (Rutkowski et al., 2015). Still, our results suggest that viral  
274 DNA and/or DNA-associated proteins mediate very rapid, predominantly nonspecific,  
275 interactions within RCs.

### 276 **HSV1 DNA is more accessible than host chromatin to Pol II**

277 The result that Pol II molecules remain bound—however transiently—to the viral DNA, even  
278 in the absence of transcription, suggests that the DNA itself likely plays a dominant role in Pol II  
279 enrichment in RCs. To our knowledge, the genome copy number present in individual RCs has  
280 never been determined, but this information is crucial to understand the role viral DNA may play  
281 in RC formation and function. We therefore sought to measure the amount of DNA in RCs using  
282 Oligopaints, a variant of DNA fluorescence in situ hybridization, to target fluorescent probes to  
283 two specific regions of the viral genome (Figure 4A) (Beliveau et al., 2012; Boettiger et al.,  
284 2016). Infected cells were fixed three, four, five, and six hours post infection. The amount of  
285 DNA was measured by fluorescence intensity of the compartment, determined independently for  
286 the two probe sets. These fluorescence intensities were compared to samples that were infected  
287 in the presence of phosphonoacetic acid (PAA), a compound that prevents replication of the viral  
288 DNA and thus ensures that there is one copy of the viral genome per punctum (Figure 4B)  
289 (Eriksson and Schinazi, 1989).

290 While there is a great deal of expected RC-to-RC heterogeneity, the number of genomes  
291 within an RC correlates well with the time post infection (Figure 4C). There is also a strong  
292 correlation between RC size and genome copy number (Figure S6). Based on these data, we  
293 calculate that the average RC at 6 hpi has a DNA concentration of  $3.9 \times 10^4$  bp/ $\mu\text{m}^3$ ,  
294 approximately 240 times less concentrated than average host chromatin. The sum of all RCs in  
295 an average infected cell corresponds to just ~0.2% of total DNA in karyotypically normal human  
296 nuclei (Table S3). Despite being orders of magnitude lower in DNA content and concentration,  
297 inhibition of viral DNA replication with PAA caused a ~20% decrease in the fraction of bound  
298 Pol II molecules inside the pre-replication foci as measured by spaSPT, nearly down to the level  
299 of host chromatin (Figure 4D). This, despite the fact that all immediate early and early genes,  
300 including many of the proteins known to interact with Pol II, are still highly expressed in PAA-  
301 treated samples (Lester and DeLuca, 2011; Zhou and Knipe, 2002).

302 Since most of the Pol II binding events that we observe inside of an RC appear to be  
303 unrelated to transcription, but clearly dependent on viral DNA replication, we wondered what  
304 might be different about the viral genome relative to host chromosomes. A likely candidate is the  
305 chromatin state of the viral DNA. There is presently no clear consensus about the organization of  
306 viral DNA during lytic infection. Multiple studies have successfully used ChIP to sample histone  
307 marks to determine histone association with the viral DNA (Bloom et al., 2010; Lang et al.,



2017; Lee et al., 2016), though this may also be explained by formation of nonnucleosomal histone-DNA intermediates (Torigoe et al., 2011), especially since mass spectrometry studies have failed to detect histones associated with viral DNA (Dembowski and DeLuca, 2015; Taylor and Knipe, 2004). Moreover, immunofluorescence against histones shows no detectable signal in RCs (Dembowski and DeLuca, 2015). In addition, one function of viral ICP0 is to actively evict histones from DNA, which suggests that the HSV1 genome is maintained largely free of histones (Lee et al., 2016).

To test histone occupancy of the viral DNA, and get a measure of its accessibility, we turned to ATAC-seq, which gives signal proportional to the accessibility of the DNA at a given locus (Buenrostro et al., 2013). We infected our HaloTag-Pol II cell line, and performed Tn5 transposition reactions at 2, 4, and 6 hpi. We also included a sample that was uninfected, and one infected in the presence of PAA. At all times after infection, the distribution of fragment lengths mapping to the viral genome showed a much faster decay, and no evidence of nucleosomal laddering, in contrast to reads that map to the host genome (Figure 4E, Figure S7). When we visualized the reads along the viral genome, the profiles were strikingly flat and featureless, suggesting that all regions of the viral genome are equally accessible to Tn5 (Figure 4F).

Based on the amount of viral DNA present in an infected cell, we calculated the fraction of reads one would expect to map to the virus relative to the host. At 6 hpi, under our infection conditions, viral DNA represents an average 0.2% of total nuclear DNA content. Yet, at this time point, 24.2% of reads mapped to the virus on average. From this, we calculate that DNA inside of RCs is two orders of magnitude more accessible, despite its overall lower DNA concentration relative to host DNA (Table S3).

In metazoan genomes, active genes can be identified by their high accessibility (Thurman et al., 2012). An average of all annotated human mRNA genes, centered at the TSS, shows a characteristic peak of accessibility at the TSS for reads with a length corresponding to inter-nucleosomal distances (<100 bp), and a characteristic trough of mononucleosome sized fragments (180 – 250 bp) (Figure 4G). By contrast, TSS averages mapped to the viral genome for either short or mono-nucleosome fragments show no changes in accessibility. Thus, even averaging over all viral transcripts, it is clear that the entire viral DNA remains equally accessible (Figure 4H). Taken together, these data indicate that the HSV genome is maintained in a largely nucleosome-free state and thus, highly accessible to DNA binding proteins such as Pol II.

### **Transient DNA-protein interactions drive Pol II hub formation through repetitive exploration of the replication compartment**

Knowing that the DNA inside RCs is vastly more accessible to nuclear factors than the host chromatin, we next asked what emergent properties of this accessible DNA might help explain Pol II recruitment. We took advantage of a viral strain that is able to incorporate chemically modified nucleotides during replication (Dembowski and DeLuca, 2015), to label newly replicated viral DNA with Alexa Fluor 647, and thus allow DNA in the RCs to be visualized at high resolution using stochastic optical reconstruction microscopy (STORM) (Figure 5A) (Rust et al., 2006). Unlike host chromatin, whose overall density and compaction scales reproducibly with domain size for active chromatin (Boettiger et al., 2016), viral DNA shows a spatial variability in local density of nearly three orders of magnitude.

The greater accessibility and higher variability in local density of viral DNA lend themselves to a possible mechanism by which Pol II becomes enriched. Recent theoretical work has shown that a polymer, like DNA, which has many binding sites in close proximity can induce a particle

354 to revisit the same or adjacent sites repetitively during its exploration of the nucleus (Amitai,  
355 2018) (Figure 5B). In such a case, we should be able to see signatures in our spaSPT dataset of  
356 Pol II continually revisiting adjacent sites on the viral DNA. To check, we calculated the angle  
357 formed by every three consecutive displacements and compiled these angles into a histogram for  
358 all particles strictly identified as freely diffusing (see Methods) (Figure 5C) (Izeddin et al.,  
359 2014). For particles experiencing ideal Brownian motion, the angular histogram will be isotropic.  
360 Anisotropy can arise either by imposing reflective boundaries on the particle, or adding the  
361 aforementioned “traps” thereby giving the particle a greater probability of revisiting proximal  
362 sites before diffusing away (Amitai, 2018).

363 In uninfected cells, and in infected cells outside of RCs, Pol II displays diffusion that is only  
364 mildly anisotropic, consistent with mostly Brownian motion throughout the nucleus. In stark  
365 contrast, inside RCs Pol II diffusion is more anisotropic, especially around  $180^\circ$  (Figure 5D). To  
366 compare across samples, we computed the likelihood of a backward translocation ( $180^\circ \pm 30^\circ$ )  
367 relative to the likelihood of a forward translocation ( $0^\circ \pm 30^\circ$ ). Analyzed this way, Pol II in an  
368 uninfected nucleus has a 1.3-fold greater chance of moving backward after a given translocation  
369 than it has of moving forward (Figure 5E). As expected, Pol II outside of RCs in infected cells  
370 has a nearly identical value to Pol II in an uninfected cell. Inside of an RC, however, that  
371 probability increases to 1.7-fold, showing that this effect is unique to RCs (Figure 5E). In cells  
372 treated with Triptolide, we see that when stable binding is inhibited, the effect created by  
373 transient binding events is further amplified (Figure 5E). Under this condition, Pol II inside an  
374 RC is 2-fold more likely to have a backward displacement after a forward one (Figure 5D),  
375 which helps explain the dramatic retention of Pol II inside RCs, even 45 minutes after inhibition  
376 of transcription (Figure 3C). Importantly, in uninfected cells where RC annotations have been  
377 shuffled *in silico*, no additional anisotropy is observed (Figure S3).

378 These data are most consistent with a model in which Pol II repetitively visits the highly  
379 accessible viral genome via multiple weak, transient binding events that result in Pol II rapidly  
380 hopping along the DNA. The sharp anisotropy of the molecular exploration within the RC means  
381 that a given Pol II molecule that enters an RC is more likely to visit the same site, or sites close  
382 in proximity, multiple times before it either finds a stable binding site or diffuses away.

383 The heterogeneous distribution of viral DNA within RCs, and the anisotropic way Pol II  
384 explores RCs, is also borne out in the distribution of Pol II molecules. We performed 3D  
385 photoactivated localization microscopy (3D PALM) on cells, using adaptive optics for precise  
386 3D localization of individual Pol II molecules (Betzig et al., 2006; Izeddin et al., 2012). Similar  
387 to the viral DNA, PALM renderings of infected nuclei revealed a heterogeneous Pol II  
388 distribution within RCs (Figure 5G). For a more quantitative determination of Pol II clustering,  
389 we used Ripley’s L-function, a measure of how a spatial point pattern deviates from randomness  
390 (Figure 5H) (Nicovich et al., 2017). Here, a value greater than zero indicates a concentration of  
391 points higher than predicted for complete randomness at that given radius. For very small radii, a  
392 high L(r)-r value is likely due to blinking and other photo-physical artifacts (Annibale et al.,  
393 2011). However, our measurements of Ripley’s L-function remains well above zero and  
394 increases for all radii between 0 and 1000 nanometers, suggesting that Pol II forms hubs within  
395 RCs and that this clustering occurs at multiple length scales. This is consistent with other recent  
396 studies of Pol II in uninfected cells (Boehning et al., 2018), and in contrast to a structural protein  
397 like the CCCTC-binding factor (CTCF), whose L(r)-r curve shows clusters of a single  
398 characteristic size (Hansen et al., 2017).

### 399 **Nonspecific interactions with viral DNA license recruitment of other proteins**

400 Seeing that Pol II is recruited to RCs via transient and nonspecific binding to the viral  
401 genome made us wonder whether this effect was specific to Pol II, or whether DNA accessibility  
402 can generally drive the recruitment of DNA-binding proteins to RCs. Certainly, many other  
403 DNA-binding proteins are recruited to RCs (Dembowski and DeLuca, 2015; Taylor and Knipe,  
404 2004). To assess whether nonspecific DNA binding could be responsible for accumulation of  
405 other proteins within RCs, we looked at enrichment of the tetracycline repressor (TetR). TetR is  
406 a sequence-specific transcription factor found in bacteria that binds with high affinity to the 19  
407 bp *tetO* sequence, which is absent in both human and HSV1 genomes (Bolintineanu et al., 2014).  
408 Thus, we reasoned that if nonspecific DNA association is the mechanism driving recruitment to  
409 the RC, TetR should also be recruited to the RC.

410 We transiently transfected TetR-GFP into the HaloTag-Pol II cell line, then infected them  
411 with HSV1 the following day. TetR-GFP, lacking a nuclear localization signal (NLS),  
412 ubiquitously occupies both the nucleus and cytoplasm. As predicted by our model, GFP signal  
413 was enriched inside of RCs (Figure 6). Pixel line scans of the matched Pol II and TetR channels  
414 show that the level of enrichment is modest (~25% over background for TetR, compared with  
415 ~200% for Pol II), but the two signals showed a high Spearman correlation ( $r > 0.77$ ). A  
416 fluorescent protein with only an NLS showed no enrichment at RCs in infected cells (Figure S8).  
417 Thus, even a sequence-specific transcription factor with no cognate binding sites in the viral  
418 genome can be recruited to RCs based on its modest affinity for nonspecific DNA sequences.

419 These data suggest a model in which viral Pol II recruitment consists of transient, nonspecific  
420 binding/scanning events of the highly exposed viral genome (Figure 7A). A DNA-binding  
421 protein exploring the nucleus (uninfected, or infected but outside of RCs) may encounter some  
422 occasions for nonspecific interaction with duplex DNA, but because of the condensed nature of  
423 the host chromatin, these binding/scanning events are necessarily short (Figure 7B). In addition,  
424 it may take a protein many thousands of these transient binding events to finally reach a high-  
425 affinity site (Normanno et al., 2015). Within RCs, multiple copies of the highly accessible HSV1  
426 genome are present, nonspecific events happen more frequently, with fewer and shorter 3D  
427 excursions between DNA contacts (Figure 7C), leading to redundant exploration of the RC and  
428 local accumulations of protein. This enrichment becomes even more skewed when aided by a  
429 high density of other interactors—for example when transcription is active on the viral DNA,  
430 and thus the both specific and general transcription factors are enriched via the same mechanism.  
431 Our data strongly indicate, though, that host Pol II accumulation at HSV1 RCs is not dependent  
432 on active transcription but instead is largely driven by transient, nonspecific protein-DNA  
433 interactions resulting from the high accessibility of the viral DNA.

## 434 Discussion

### 435 Multiple routes to create high local concentrations

436 Here we have demonstrated that Herpes Simplex Virus type 1 accumulates Pol II in  
437 replication compartments through a novel mechanism: its unusually accessible DNA genome  
438 provides many potential nonspecific binding sites, which causes a net accumulation of Pol II,  
439 acting as a molecular sink even in the absence of transcription. Such a mechanism for locally  
440 concentrating proteins is revealing, as it neither requires the formation of a stable  
441 macromolecular structure nor produces any behaviors at the single-molecule level suggesting a  
442 separate liquid phase. It is particularly striking because, from the macroscopic view, Pol II  
443 recruitment to RCs appears to share many of the behaviors commonly attributed to liquid-liquid



444 phase separation—enrichment of proteins that have high intrinsic disorder, spherical, dynamic  
445 structures that undergo fusion, and a change in refractive index—and yet RCs are clearly a  
446 distinct class of membraneless compartments.

447 Given the high prevalence of IDRs in the viral proteome, it is likely that they have crucial  
448 functions in other aspects of the viral lifecycle, such as the assembly of the capsid or packaging  
449 of tegument proteins prior to envelopment. It still remains a possibility that these IDRs form  
450 some phase-like system inside of RCs. Crucially, our data demonstrate that, even if this is the  
451 case, it does not contribute to the enrichment or entrapment of Pol II. Our results prompt the  
452 need for a better characterization of *bona fide* phase separation, with a focus on its functional  
453 consequences *in vivo*. These data underscore the importance of rigorously dissecting the diverse  
454 mechanisms driving subcellular compartment formation, and suggest that caution should be  
455 exercised before immediately assigning LLPS as the primary assembly mechanism or  
456 interpreting the functional role of a phase-separated system solely based on macroscopic  
457 behaviors.

458 We emphasize that this is certainly not the only means by which herpesviruses interact with  
459 Pol II; many other studies have carefully documented the roles of both host and viral proteins in  
460 recruiting Pol II to transcribe viral genes (Davis et al., 2015; Zhou and Knipe, 2002). What  
461 makes the mechanism proposed above so appealing is that it applies across multiple cellular  
462 processes; not just transcription. During its lifecycle, the virus must also utilize other cellular  
463 factors such as the DNA replication, repair, and recombination machinery (Dembowski and  
464 DeLuca, 2015; Muylaert and Elias, 2007; Taylor and Knipe, 2004). By utilizing nonspecific  
465 binding events as a means of attracting DNA-binding proteins and their cofactors, the virus has  
466 shifted the equilibrium in those locations, thereby enhancing the probability of regulatory factors  
467 binding at specific, functional sites. As a consequence, assembly of typically inefficient multi-  
468 protein complexes like the transcription pre-initiation complex (Darzacq et al., 2007), could  
469 become more favorable inside of RCs. We speculate that nonspecific protein-DNA interactions  
470 could be a general mechanism used by many other viruses. We also note that many RNA-binding  
471 proteins have been reported to undergo apparent LLPS (Courchaine et al., 2016) and believe it  
472 will be interesting to explore if RNA-binding proteins share a similar mechanism to what we  
473 describe here.

#### 474 **Nonspecific binding events represent an important part of nuclear exploration**

475 Our data also reveal a previously underappreciated aspect of how a DNA binding protein  
476 finds its target DNA within the nucleus. It has long been recognized that nonspecific binding to  
477 DNA could greatly accelerate the target search process by allowing for sliding in 1D along the  
478 DNA, thereby reducing the search space and allowing for faster-than-diffusion association  
479 kinetics (Berg et al., 1981). This is the case in bacterial systems where DNA is generally  
480 accessible to binding. A number of theoretical studies have addressed various aspects of the  
481 problem in eukaryotic systems, where TFs compete with nucleosomes for access to DNA  
482 (Mirny, 2010). In these cases, the DNA polymer is treated as a surface of variable binding  
483 energies on which a transcription factor may slide—if there are no nucleosomes to impede its  
484 diffusion (Mirny et al., 2009). *In vivo* experiments using sequence-specific eukaryotic  
485 transcription factors find that, for the cases studied, a given factor will spend approximately half  
486 its search time undergoing 3D diffusion, and the other half bound nonspecifically, presumably  
487 scanning in 1D (Chen et al., 2014; Hansen et al., 2017; Normanno et al., 2015).

488 The data we present here offer a new perspective on the importance of nonspecific and low-  
489 affinity binding, and competition for nucleosomes inside the nucleus. When the virus begins

490 replicating, we measured the newly synthesized DNA to be ~130 times more accessible to DNA-  
491 binding proteins than the surrounding host chromatin (Table S3). Not only is there simply more  
492 DNA available to bind in the absence of nucleosomes, but the distance that a protein can scan in  
493 1D is greatly increased due to the lack of impeding nucleosomes. Pol II is not a canonical DNA-  
494 binding protein, and no systematic study has been undertaken to measure its binding affinities  
495 against with different substrates. Still, having evolved to be an enzyme that must transcribe  
496 highly diverse DNA sequences suggests that its affinity for DNA outside of an assembled PIC  
497 may be relatively high. A recent study which explicitly modeled nonspecific DNA binding in the  
498 context of 3D genome organization finds that the most effective regime for recruiting a DNA  
499 binding protein is exactly what the virus appears to have settled on—that is a region of low  
500 overall DNA density that is free of nucleosomes recruiting a protein with high nonspecific  
501 affinity (Cortini and Filion, 2018).

502 The virus' strategy may be shared by the host in facilitating enhancer-promoter contacts.  
503 Both promoter and enhancer elements are identifiable by their increased DNA accessibility.  
504 While some recent reports have suggested that enhancers may phase separate as a mechanism of  
505 activating transcription (Cho et al., 2018; Hnisz et al., 2017; Sabari et al., 2018), the data  
506 presented above suggest that the mechanisms that keep a cluster of enhancers and promoters  
507 accessible to DNA-binding proteins may facilitate the accumulation of Pol II and other PIC  
508 components, without the need for invoking LLPS.

#### 509 **Mechanism of Pol II recruitment may explain robust transcription of late genes**

510 An unresolved question in the study of herpesviruses is how genes with seemingly weak  
511 promoter elements can sustain such robust transcription, especially in the case of late gene  
512 promoters which often contain little more than a TATA box and Initiator elements (Rajčáni et  
513 al., 2004). How are these transcripts so highly expressed off of such weak promoters? While it is  
514 clear that other regulatory components also play a role in regulation of late genes (Davis et al.,  
515 2015; Lester and DeLuca, 2011; Li et al., 2018), our data may help shed light on how the virus  
516 robustly transcribes them after replication onset. After replication, when there are many copies of  
517 the viral genome present in a single RC, the compartmentalization of Pol II (and the other  
518 general transcription factors) mediated through nonspecific binding to the viral DNA also favors  
519 assembly of PICs at otherwise weak late gene promoters. In this way, the virus can conserve  
520 precious sequence space in its genome to encode other important features, and rely on  
521 fundamental mechanisms of nuclear exploration for Pol II, and other components of the  
522 transcription machinery, to provide sufficient gene expression for these late genes.  
523

524 **Author Contributions**

525 Conceptualization, D.T.M., X.D., and R.T.; Methodology D.T.M., A.S.H., H.M-N., S.T.,  
526 X.D., and R.T.; Investigation, D.T.M., Y.H., K.K.U., and C.D-D; Software, D.T.M., A.S.H.,  
527 H.M-N., S.T., and A.B.H; Writing – Original Draft, D.T.M; Writing – Review & Editing,  
528 D.T.M., A.S.H., H.M-N., S.T., A.B.H, C.D-D, X.D., and R.T.; Funding Acquisition, X.D., and  
529 R.T; Resources, C.D-D.; Supervision, D.T.M, X.D., and R.T.

530 **Acknowledgments**

531 We would like to thank James Goodrich, Jennifer Kugel, and Robert Abrisch for providing  
532 the HSV1 strain KOS that began this project, and for helpful discussions. Thank you also to Neal  
533 DeLuca for the generous gift of the UL2/50 HSV1 strain. Thank you to Luke Lavis for  
534 generously providing all of the Janelia Fluor dyes that enabled these experiments. Thank you to  
535 Ana Robles and Astou Tangara for their tireless work keeping the microscopes in working order.  
536 Thank you to all of the individuals who provided reagents, comments, and critical insight for this  
537 manuscript, including Shasha Chong, Thomas Graham, Britt Glaunsinger, Ella Hartenian,  
538 Matthew Parker, and the Tjian and Darzacq Lab members. This work was supported by NIH  
539 grants UO1-EB021236 and U54-DK107980 (XD), the California Institute of Regenerative  
540 Medicine grant LA1-08013 (XD), by the Howard Hughes Medical Institute (003061, RT).  
541 Portions of this work were performed on shared instrumentation at the CRL Molecular Imaging  
542 Center, supported by The Gordon and Betty Moore Foundation. We would like to thank Holly  
543 Aaron and Jen-Yi Lee for their assistance. DNA sequencing in this work used the Vincent J  
544 Coates Genomics Sequencing Laboratory at UC Berkeley, supported by NIH 669 S10  
545 Instrumentation Grants S10RR029668 and S10RR027303.

546 **Figure Legends**

547 **Figure 1. Pol II recruitment to Replication Compartments exhibit hallmarks of liquid-**  
548 **liquid demixing** **A)** Representative matched images of HaloTag-Pol II labeled with JF<sub>505</sub> and  
549 Spatial Light Interference Microscopy to measure phase shifts for an uninfected cell, and for a  
550 cell 5 hpi. Arrows highlight examples of corresponding regions in the two images where an RC  
551 shows a significantly different phase value compared with the surrounding nucleoplasm. **B)**  
552 Time-lapse images from two cells (“Cell 1” and “Cell 2”). Zoom in shows RCs fusing beginning  
553 at t = 204 min and t = 220 min, respectively. HaloTag-Pol II U2OS cells were labeled with JF<sub>549</sub>  
554 and infected, then imaged every 120 seconds beginning 3 hpi. See also Movies S1 and S2. **C)** A  
555 histogram of the aspect ratios (max diameter / min diameter) of RCs for 817 individual RCs from  
556 134 cells, 3 to 6 hpi. The dotted line marks the median value of 1.18. Red ellipses provided a  
557 guide to the eye for different aspect ratios. **D)** IUPred scores for three viral proteins (UL49, RL2,  
558 UL54) as a function of residue position. Dashed line indicates an IUPred score of 0.5. Green  
559 boxes are predicted to be IDRs. **E)** The fraction of each protein in the viral proteome that is  
560 unstructured, separated by kinetic class. Immediate early (IE) and tegument proteins are as  
561 enriched in IDRs as a curated list of proteins containing IDRs known to drive phase separation  
562 (Cited IDRs). The proteins plotted in panel D are marked with a red circle. **F)** Fluorescence  
563 Recovery After Photobleaching (FRAP) curves of Pol II in RCs from 3-4 hpi, 4-5 hpi, and 5-6  
564 hpi (n = 24, 33, and 33), compared with uninfected cells (n = 31). Curves represent the mean  
565 flanked by SEM. **G)** Representative images from cell lines expressing JF<sub>549</sub>-labeled HaloTag-  
566 RPB1 labeled with JF<sub>549</sub> with a C-terminal domain containing different numbers of heptad

567 repeats. **H)** Matched fluorescence images of JF<sub>549</sub>-labeled Pol II and DAPI. Cells were infected  
568 with HSV1 for 5 hours, then added 1,6-hexanediol to a final concentration of 10%, and fixed 1, 5  
569 and 10 minutes after treatment. All scale bars are 10  $\mu$ m.

570  
571 **Figure 2. spaSPT of Pol II in infected cells shows no change in diffusion but an increase**  
572 **in binding.** **A)** Example frames from a spaSPT movie, overlaid with the results from localization  
573 and tracking. Scale bar is 1  $\mu$ m. **B)** Masks to identify the nuclear boundary (black line) and RCs  
574 (green regions) are generated with one color channel (JF<sub>549</sub>), and these annotations are applied to  
575 trajectories from the other color channel (PA-JF<sub>646</sub>). **C)** Depiction of two-state model where Pol  
576 II can either be freely diffusing, or DNA-bound, each with a characteristic rate constant. **D)** Jump  
577 length distributions between consecutive frames of spaSPT trajectories. Histograms pooled from  
578 uninfected cells (n = 27), or HSV1 infected cells between 4 and 6 hpi (n = 96). Each distribution  
579 is fit with a 2-state model. **E)** Mean apparent diffusion coefficient derived from the 2-state fit in  
580 (D). Error bars are the standard deviation of the mean, calculated from 100 iterations of  
581 randomly subsampling 15 cells without replacement and fitting with the model. **F)** Fluorescence  
582 Loss In Photobleaching (FLIP) curves comparing the rate of fluorescence loss after  
583 photobleaching JF<sub>549</sub>-labeled Pol II in uninfected cells and HSV1 infected cells. A 1  $\mu$ m bleach  
584 spot is placed inside an RC (red crosshairs) and bleached between every frame. The loss of  
585 fluorescence is measured from another RC (black crosshairs). **G)** Cumulative Distribution  
586 Function (CDF) of the mean flanked by the SEM for jump lengths of molecules entering (left) or  
587 exiting (right) RCs. Distribution for HSV1 infected cells is compared to the distribution of  
588 molecules entering/exiting compartments that have been randomly shuffled around the nucleus  
589 *in silico*. **H)** Mean fraction of bound molecules derived from the 2-state fit in (D). Error bars are  
590 the standard deviation of the mean, calculated from 100 iterations of randomly subsampling 15  
591 cells without replacement and fitting with the model. See also Figures S2, S3A-D, and S4.

592  
593 **Figure 3. Pol II recruitment to RCs occurs independent of active transcription.** **A)**  
594 Schematic of Pol II-mediated transcription inhibition. Triptolide (TRP) prevents stable Pol II  
595 engagement with the assembled pre-initiation complex. Flavopiridol (FLV) inhibits engaged Pol  
596 II from elongating past ~50 bp. **B)** Schematic of experiment regimen for imaging infected cells  
597 after transcription inhibition. Cells are infected at time 0. At 4 hpi, cells are treated with  
598 transcription inhibitors Flavopiridol (FLV) or Triptolide (TRP) and fixed after 15, 30, or 45  
599 minutes. For live cell imaging, cells are treated with drug at 4 hpi, and after 30 minutes, they are  
600 mounted on the microscope and imaged directly. **C)** Representative images of JF<sub>549</sub>-labeled  
601 HaloTag-Pol II and DAPI after 45 minutes of Triptolide or Flavopiridol treatment. All scale bars  
602 are 10  $\mu$ m. **D)** Mean fraction bound measured from spaSPT of HaloTag-Pol II, after either  
603 Flavopiridol or Triptolide treatment. Error bars are the standard deviation of the mean, calculated  
604 from 100 iterations of randomly subsampling 15 cells without replacement and fitting with the  
605 model. **E)** FRAP recovery curves of Pol II with (hashed) and without (solid) Triptolide treatment,  
606 for uninfected cells (N = 31, 9 respectively) and cells infected with HSV1, 5hpi (N = 32, 12  
607 respectively). Also see Figure S5.

608  
609 **Figure 4. ATAC-seq reveals HSV1 DNA is much more accessible than chromatin.** **A)**  
610 Schematic representation of where Oligopaint probes target within the viral genome for DNA  
611 Fluorescence In Situ Hybridization. AlexaFluor 647-labeled probes target a 10,016 bp region in  
612 the middle of the Unique Long (UL) arm. AlexaFluor 555-labeled probes target a 7703 bp region



613 in the middle of the Unique Short (US) arm. **B)** Representative images of DNA FISH on cells  
614 infected in the presence of the replication inhibitor phosphonoacetic acid (PAA, left) and 4 hpi  
615 (right). Pixel intensity values are the same for the two images. Scale bars are 10  $\mu\text{m}$ . **C)**  
616 Quantification of fluorescence intensity of DNA FISH signal in RCs at increasing times after  
617 infection. Data are normalized to the median intensity value of cells infected in the presence of  
618 the replication inhibitor PAA. Medians are indicated by a solid line (PAA = 1, 3 hpi = 0.83, 4 hpi  
619 = 4.77, 5 hpi = 31.13, 6 hpi = 46.95). Also see Figure S5 **D)** Mean fraction bound extracted from  
620 2-state model of PA-JF<sub>646</sub>-labeled HaloTag-Pol II, comparing HSV1 infected cells between 4 and  
621 6 hpi to cells infected in the presence of PAA. Error bars are the standard deviation of the mean,  
622 calculated from 100 iterations of randomly subsampling 15 cells without replacement and fitting  
623 with the model. **E)** Fragment length distribution of ATAC-seq data for cells 4 hpi. Reads  
624 mapping to the human genome are in gray, and reads mapping to the HSV1 genome are in green,  
625 and data are normalized to the total number of reads mapping to each organism. Lengths  
626 corresponding to intra-nucleosomal DNA (50–100 bp) and mononucleosomal DNA (180-250 bp)  
627 are marked as a reference. **F)** ATAC-seq read density for all fragment lengths plotted across  
628 HSV1 genomic coordinates for uninfected cells, and for 2, 4, and 6 hpi. **G)** ATAC-seq analysis  
629 of intra-nucleosomal DNA (50–100 bp) and mononucleosomal DNA (180-250 bp). Global  
630 analysis of all human Pol II-transcribed genes, centered at the transcription start site (TSS) at  
631 different times after infection. **H)** The same analysis as in (G), but centered at the TSS of HSV1  
632 genes. Also see Figures S6 and S7.

633  
634 **Figure 5. DNA-binding alters Pol II exploration of RCs.** **A)** Representative STORM  
635 image of an HSV1 infected cell in the presence of EdU to allow labeling with AlexaFluor 647  
636 and matched diffraction-limited images and STORM reconstruction, rendered with 20 nm by 20  
637 nm pixels. Zoom-in shows one RC, and the heatmap shows the number of fluorophore  
638 localizations occurred in each rendered pixel. **B)** Schematic of Pol II entering an RC and  
639 randomly sampling the viral DNA, sometimes revisiting the same, or closely adjacent, sites  
640 before diffusing away. **C)** Example spaSPT trace, with each set of three localizations ( $n, n+1,$   
641  $n+2$ ) forming a measurable angle ( $\theta_n \dots$ ). **D)** Angular distribution histograms extracted from  
642 diffusing HaloTag-Pol II molecules in uninfected cells, and HSV1 infected cells 4-6 hpi, inside  
643 and outside of RCs. Shaded regions highlight the angles used to calculate the relative probability  
644 of moving backward compared to forward in (E). **E)** Quantification of the relative probability of  
645 moving backward compared to forward ( $180^\circ \pm 30^\circ / 0^\circ \pm 30^\circ$ ). Error bars are the standard  
646 deviation of the mean, calculated from 100 iterations of randomly subsampling 15 cells without  
647 replacement. **F)** Same as in (D), except that cells were treated with Triptolide at least 30 minutes  
648 prior to imaging. Quantification of this data is also show in (E). **G)** Representative PALM image  
649 of PA-JF<sub>646</sub>-labeled HaloTag-Pol II, rendered with a pixel side of 20 nm by 20 nm. Infected cells  
650 were identified by immunofluorescence against the HSV1 protein ICP4. Heatmap corresponds to  
651 the number of detections per rendered pixel. Dotted red lines mark the outlines of RCs, as  
652 identified by the immunofluorescence image. **H)** L-modified Ripley Curve (L(r)-r) for HaloTag-  
653 Pol II inside of RCs in cells 5 hpi ( $n = 13$  cells). Graph shows the mean flanked by the SEM. All  
654 scale bars are 10  $\mu\text{m}$ . Also see Figure S3E and S3F.

655  
656 **Figure 6. Nonspecific DNA binding drives accumulation of other factors in RCs.** **A)**  
657 Representative images of HaloTag-Pol II cells transiently transfected with TetR-GFP prior to  
658 infection with HSV1. **B)** Pixel line scans of images in (A). Red arrows in (A) give the direction

659 of the x-axis. Left axis is the intensity of TetR-GFP fluorescence, right axis is the intensity of  
660 JF<sub>549</sub>-labeled HaloTag-Pol II fluorescence. Spearman's correlation was used to measure the  
661 covariation in the two channels across the line. All scale bars are 10  $\mu\text{m}$ . Also see Figure S8.

662  
663 **Figure 7. Model for Pol II exploration of RCs. A)** A Pol II molecule encounters the  
664 accessible viral DNA multiple times along one potential route to eventually bind at a promoter.  
665 3D diffusion through the RC is interrupted by binding interactions with the viral DNA (gray  
666 circles). These binding interactions may be very transient in nature, and may involve direct  
667 interaction with the viral DNA, 1D scanning along the DNA, or transient interactions with other  
668 DNA-associated proteins. **B)** Hypothetical comparison of nuclear exploration outside RCs as a  
669 function of time and binding energy. A DNA-binding protein in the chromatinized nucleus will  
670 encounter naked DNA sporadically, making multiple low-affinity interactions before eventually  
671 finding a high affinity site. **C)** Inside an RC, the high DNA accessibility might shorten the length  
672 of 3D excursions before a DNA-binding protein encounters another region of viral DNA in a low  
673 affinity, nonspecific interaction. This, in turn, may reduce the distance a molecule might diffuse  
674 before its next binding event, and increases both the chances of that molecule remaining in close  
675 proximity and the chances that it will find a high binding energy interaction.

#### 676 **Supplementary Figure Legends**

677 **Figure S1 – RCs remain round, particularly at early times in infection.** Related to **Figure**  
678 **1. A)** Histograms of the aspect ratios (Maximum diameter / minimum diameter) for RCs from  
679 cells at 3-4 hpi (n = 219), 4-5 hpi (n = 302), and 5-6 hpi (n = 296). **B)** Aspect ratio of every  
680 measured RC, as a function of its size measured in  $\mu\text{m}^2$ . Dot colors correspond to the data sets in  
681 (A).

682  
683 **Figure S2 – Dendra2 photoconversion shows Pol II exchanges with nucleoplasm.**  
684 Related to **Figure 2.** Cells stable expressing Dendra2-Pol II were infected with HSV1.  
685 Fluorescence was monitored in both the green channel (pre-conversion), and red channel (post-  
686 conversion). A 1 $\mu\text{m}$  spot of 405nm light was used to convert one RC from green to red,  
687 alternating between photoconversion and frame acquisition. All scale bars are 10  $\mu\text{m}$ .

688  
689 **Figure S3 – Comparison of *bona fide* RCs with RCs generated *in silico*.** Related to  
690 **Figure 2. A)** Example workflow for uninfected cells, where either just the nucleus was masked  
691 (left), or the nucleus was masked and RC-sized annotations were randomly placed inside the  
692 nucleus (right). **B)** Example workflow for HSV1 infected cells, where both the correct  
693 annotations based on the widefield image and randomly shuffled RCs were generated for all  
694 measured cells. **C)** Spot-On measurements of trajectories after inside/outside classification in  
695 uninfected cells. *In silico* shuffling of RC positions has very little effect on either the measured  
696 apparent diffusion coefficient or the fraction bound. Error bars are the standard deviation of the  
697 mean, calculated from 100 iterations of randomly subsampling 15 cells without replacement and  
698 fitting with the model. **D)** Similar to (C), but for infected cells. Real RCs show an increase in  
699 fraction bound, whereas *in silico* shuffled compartments show no difference with trajectories  
700 outside RCs. **E)** Angular distributions of Pol II trajectories in the regions marked in (A)  
701  $\text{Fold}(180/0)$  is the mean plus/minus the standard deviation, calculated from 100 iterations of  
702 randomly subsampling 15 cells without replacement and fitting with the model. **F)** Angular  
703 distributions of Pol II trajectories in the regions marked in (B).  $\text{Fold}(180/0)$  is the mean

704 plus/minus the standard deviation, calculated from 100 iterations of randomly subsampling 15  
705 cells without replacement and fitting with the model. All scale bars are 10 $\mu$ m.

706  
707 **Figure S4 – Diffusion coefficient of Bound population is consistent with chromatin**  
708 **binding.** Related to **Figure 2.** Mean diffusion coefficient of the Bound population determined  
709 through 2-state model fitting for uninfected cells, and for cells at different times post infection,  
710 both inside and outside of RCs. In all data sets, the calculated diffusion coefficient is well below  
711 the upper bound set for the fitting, consistent with diffusion coefficients of chromatin (Hansen et  
712 al., 2018). Error bars are the standard deviation of the mean, calculated from 100 iterations of  
713 randomly subsampling 15 cells without replacement and fitting with the model.

714  
715 **Figure S5 – Transcription inhibition does not remove Pol II from RCs.** Related to **Figure**  
716 **3. A)** Representative images of U2OS cells, 4 hpi, either untreated or treated with the  
717 transcription inhibitors flavopiridol or triptolide. FISH probes against the intron to the HSV1  
718 gene RL2 mark ongoing transcription, while immunofluorescence against the viral protein ICP8  
719 marks infected cells by their RCs. All images within a color channel have been matched to have  
720 the same minimum and maximum pixel values. All scale bars are 10 $\mu$ m. **B)** Quantitation of  
721 transcription inhibition from (A). The FISH intensity in a 1 $\mu$ m z-section is compared in RCs  
722 from untreated cells (n = 170 RCs) to those treated for 15, 30, or 45 minutes with TRP( n = 192,  
723 171, 191 RCs, respectively) and FLV(n = 158, 238, 153 RCs, respectively). Error bars represent  
724 standard error of the mean. **C)** Quantitation of Pol II recruitment to RCs from conditions in (A).  
725 The Pol II fluorescence intensity in a 1 $\mu$ m z-section is compared in RCs from untreated cells (n =  
726 247 RCs) to those treated for 15, 30, or 45 minutes with TRP( n = 276, 206, 270 RCs,  
727 respectively) and FLV(n = 292, 246, 325 RCs, respectively). Error bars represent standard error  
728 of the mean.

729  
730 **Figure S6 – Quantification of DNA content in HSV1 RCs.** Related to **Figure 4. A)** Dot  
731 plot showing the individual RC values from Figure 4C; normalized to the median of cells  
732 infected in the presence of PAA. Medians are indicated by a solid line (PAA = 1, 3 hpi = 0.83, 4  
733 hpi = 4.77, 5 hpi = 31.13, 6 hpi = 46.95). **B)** Genome content of individual RCs in (A), plotted as  
734 a function of their area. Spot color corresponds to the times post infection as in (A). Line is a  
735 least squares quadratic fit to all data points ( $R^2 = 0.83$ ).

736  
737 **Figure S7 – HSV1 genome appears nucleosome free at all times tested.** Fragment length  
738 distributions of all conditions tested after HSV1 infection, for two individual replicates as well as  
739 for the pooled data. The green line indicates the lengths of fragments mapping to the viral  
740 genome, the gray line indicates lengths of fragments mapping to the human genome. All data are  
741 normalized to the total number of mapped reads to the respective genome, per condition.

742  
743 **Figure S8 – YFP-NLS does not colocalize with RCs. A)** Representative images from cells  
744 transfected with YFP-NLS and then infected with HSV1. YFP-NLS forms occasional puncta in  
745 the nucleus, but these do not overlap with RCs, as marked by Pol II. **B)** Pixel line scans of  
746 images in (A). Red arrows in (A) give the direction of the x-axis. Left axis is the intensity of  
747 YFP-NLS fluorescence, right axis is the intensity of JF<sub>549</sub>-labeled HaloTag-Pol II fluorescence.  
748 Spearman's correlation was used to measure the covariation in the two channels across the line.  
749 All scale bars are 10  $\mu$ m.



750  
751 **Table S1 – List of putative IDRs in the HSV1 genome identified by IUPred.** Each protein  
752 listed was analyzed as described in the Methods section, and regions with an IUPred score of  
753 greater than 0.55 were recorded.

754  
755 **Table S2 – List of proteins reported to undergo phase separation.** Gene name, organism  
756 of origin, size, and the fraction of the protein that scores as an IDR according to the analysis  
757 described in the Methods section. References and the citation within and provided.

758  
759 **Table S3 – Quantitative measurements of HSV1 DNA inside of RCs.** Using the values  
760 obtained through DNA FISH and ATAC-seq, we can make estimates of the copy number,  
761 concentrations, and relative enrichment of the viral DNA compared to the host. All values are  
762 calculated based on measurements of cells 6 hpi.

763  
764 **Movie S1 and S2 – Time lapse movies of HaloTag-Pol II after HSV1 infection.** Cells  
765 were identified 3 hpi, and followed until they moved out of the focal plane.

## 766 **Experimental Procedures**

### 767 **Tissue Culture**

768 Human U2OS cells (female, 15 yr old, osteosarcoma) were cultured at 37°C and 5% CO<sub>2</sub> in  
769 1 g/L glucose DMEM supplemented with 10% Fetal Bovine Serum and 10 U/mL Penicillin-  
770 Streptomycin, and we subcultivated at a ratio of 1:3 – 1:6 every two to four days. Stable cell  
771 lines expressing the exogenous gene product  $\alpha$ -amanitin resistant HaloTag-RPB1(N792D) or  
772 Dendra2-RPB1(N792D) were generated using Fugene 6 following the manufacturer's protocol,  
773 and selection with 2  $\mu$ g/mL  $\alpha$ -amanitin. Stable colonies were pooled and maintained under  
774 selection with 1  $\mu$ g/mL  $\alpha$ -amanitin to ensure complete replacement of the endogenous RPB1  
775 pool, as described previously (Boehning et al., 2018; Cisse et al., 2013).

776 Vero cells, were cultured for the growth and propagation of HSV1. Vero cells were cultured  
777 at 37°C and 5% CO<sub>2</sub> in 4.5 g/L glucose DMEM supplemented with 10% Fetal Bovine Serum  
778 and 10 U/mL Penicillin-Streptomycin. Cells were subcultivated at a ratio of 1:3 – 1:8 every two  
779 to four days.

780 HSV1 Strain KOS was a generous gift from James Goodrich and Jennifer Kugel (Abrisch et  
781 al., 2015). UL2/50 was a generous gift from Neal DeLuca (Dembowski and DeLuca, 2015). All  
782 virus strains were propagated in Vero cells as previously described (Blaho et al., 2005). Briefly,  
783 cells were infected by incubation at an MOI ~ 0.01 in Medium 199 (Thermo) for one hour. 36-48  
784 hpi, cells were harvested by freeze-thawing, pelleted, and sonicated briefly, and then centrifuged  
785 to clear large cellular debris. Because we were interested in the early events in infection,  
786 approximate titers were first determined by plaque formation assay in Vero cells (Blaho et al.,  
787 2005). More accurate MOI were determined by infecting U2OS cells plated on coverslips with  
788 the same protocol as would be using for imaging experiments. Cells were washed once with  
789 PBS, and then 100  $\mu$ L of complete medium containing 1:10 – 1:10<sup>5</sup> dilutions of harvested virus  
790 were added dropwise onto the coverslip to form a single meniscus on the coverslip. Infection was  
791 allowed to proceed for 15 minutes at 37 °C. Samples were then washed once with PBS and  
792 returned to culturing medium and incubated for 8 hours before fixation. To measure the MOI,  
793 immunofluorescence for the expression of ICP4 using an anti-ICP4 primary antibody (Abcam),

794 and counting the number of infected versus uninfected cells. MOI was then calculated, assuming  
795 a Poisson distribution of infection events, as  $P(k_{inf}) = \frac{MOI^{k_{inf}} e^{-MOI}}{k_{inf}!}$ , where  $k_{inf}$  is the number of  
796 infection events per cell. When counting the uninfected cells, this simplifies to  
797  $MOI = -\ln(f_{uninfected})$ . All experiments were performed from the same initial viral stock,  
798 with care taken so that each experiment was done with virus experiencing the same total number  
799 of freeze/thaw cycles to ensure as much consistency as possible.

### 800 **Live cell imaging**

801 Cells were plated on plasma-cleaned 25 mm circular No. 1.5H cover glasses (Marienfeld  
802 High-Precision 0117650) and allowed to adhere overnight. For experiment using Halo-RPB1,  
803 cells were incubated with 50 – 500 nM fluorescent dye (e.g. JF<sub>549</sub>) conjugated with the HaloTag  
804 ligand for 15 minutes in complete medium. Cells were washed once with PBS, and the media  
805 replaced with imaging media (Fluorobrite media (Invitrogen) supplemented with 10% FBS and  
806 10 U/mL Penicillin-Streptomycin). Prior to imaging, coverslips were mounted in an Attofluor  
807 Cell Chamber filled with 1 mL of imaging medium. Cells were maintained at 37 °C and 5 %  
808 CO<sub>2</sub> for the duration of the experiment. For long term time course imaging experiments, cells  
809 were plated in 35mm No. 1.5 glass-bottomed imaging dishes (MatTek), infected with HSV1 at  
810 an MOI of ~1, and labeled with JF<sub>549</sub>, and finally the media exchanged for imaging media before  
811 placing in a pre-warmed Biostation (Nikon). At 3 hours post infection, infected cells were  
812 identified and imaged were taken every 30 seconds for 5 hours. For phase images, cells were  
813 plated and labeled as above, and imaged on a custom-built widefield microscope with a SLIM  
814 optics module (PhiOptics) placed in the light path directly before the camera.

### 815 **IUPred disorder prediction**

816 Disorder predictions were performed using a custom built python script to implement the  
817 IUPred intrinsic disorder prediction program (Dosztanyi et al., 2005; Dosztányi et al., 2005).  
818 Specific protein sequences were placed in a table and this was fed into the script. All protein  
819 sequences were downloaded from the reference organism at uniprot.org. The resulting traces  
820 were smoothed by a rolling mean of 8 residues to remove noise and prevent single low-energy  
821 residues from splitting single large IDRs into multiple apparent IDRs. Contiguous substrings of  
822 residues with centered-mean IUPred disorder likelihood greater than 0.55 were annotated as  
823 "disordered regions" (Fig. 1E), and those contiguous regions larger than 10 amino acids were  
824 included in the calculation of "fraction IDR".

### 825 **Fluorescence Recovery After Photobleaching (FRAP)**

826 FRAP experiments were performed as previously described, with modifications. HaloTag-  
827 RPB1 cells labeled with 500 nM JF<sub>549</sub> were imaged on an inverted Zeiss LSM 710 AxioObserver  
828 confocal microscope with an environment chamber to allow incubation at 37°C and 5% CO<sub>2</sub>.  
829 JF<sub>549</sub> was excited with a 561 nm laser, and the microscope was controlled with Zeiss Zen  
830 software. Images were acquired with a 63x Oil immersion objective with a 3x optical zoom.  
831 1200 total frames were acquired at a rate of 250 msec per frame (4 Hz). Between frames 15 and  
832 16, an 11-pixel (0.956 μm) circle was bleached, either in the center of a RC, or in a region of the  
833 nucleus far from the nuclear periphery or nucleoli.

834 FRAP movies were analyzed as previously described (Hansen et al., 2017). Briefly, the  
835 center of the bleach spot was identified manually, and the nuclear periphery segmented using  
836 intensity thresholding that decays exponentially to account for photobleaching across the time of  
837 acquisition. We measured the intensity in the bleach spot using a circle with a 10 pixel diameter,

838 to make the measurement more robust to cell movement. The normalized FRAP values were  
839 calculated by first internally normalizing the signal to the intensity of the whole nucleus to  
840 account for photobleaching, then normalizing to the mean value of the spot in the first 15 frames.  
841 We corrected for drift by manually updating a drift-correction vector with the stop drift every  
842 ~40 frames. FRAP values from individual cells were averaged across replicates to generate a  
843 mean recovery curve, and the error displayed is the standard error of the mean.

#### 844 **Fluorescence Loss in Photobleaching (FLIP)**

845 FLIP experiments were performed on the same microscope described above for FRAP.  
846 Rather than bleach an 11-pixel spot a single time, in FLIP the spot is bleached with a 561 nm  
847 laser (or in the case of Dendra2, photoconverted with a 405 nm laser) between each acquisition  
848 frame. Movies were collected for 1000 frames at 250 msec per frame (4 Hz), or 1 frame per  
849 second (1 Hz) for Dendra2.

850 FLIP movies were analyzed using the same core Matlab code as the FRAP data, except that  
851 fluorescence intensities from another 10-pixel circle were recorded to measure the loss of  
852 fluorescence elsewhere in the nucleus. This analysis spot was chosen to be well away from the  
853 bleach spot, either at a neighboring RC in infected samples or somewhere else in the  
854 nucleoplasm far away from both the nuclear periphery and nucleoli. Instead of internally  
855 correcting for photobleaching, photobleaching correction was based on an exponential decay  
856 function empirically determined to be at a rate of  $e^{-0.09}$  per frame. FLIP data from multiple cells  
857 were averaged together to determine the mean and standard error for a given condition.

#### 858 **RNA Fluorescence In Situ Hybridization (FISH) and immunofluorescence (IF)**

859 RNA FISH was used to measure the transcription output for a given RC. To ensure we were  
860 measuring nascent transcription, we chose to tile the intronic region of RL2, one of the few  
861 HSV1 transcripts with an intron. The 25 oligonucleotide probes were synthesized conjugated  
862 with a Cal Fluor 610 dye (Biosearch Technologies). FISH was performed based on the  
863 manufacturer's protocol. Briefly, cells were plated on 18 mm No. 1.5 coverslips (Marienfield)  
864 and infected. At the desired time point, cells were fixed in 4% Paraformaldehyde diluted in PBS  
865 for 10 minutes. After two washes with PBS, coverslips were covered with 70% v/v ethanol and  
866 incubated at -20 °C for 1 hour up to 1 week.

867 For hybridizations, coverslips were removed from ethanol and washed in freshly-prepared  
868 Wash Buffer A (2 volumes 5x Wash Buffer A, 1 volume formamide, 7 volumes H<sub>2</sub>O) (Biosearch  
869 Technologies). Hybridization buffer (10% v/v Dextran Sulfate, 300 mM Sodium Chloride, 30  
870 mM Sodium Citrate, 400, 10% Formamide v/v, and 12.5 nM pooled fluorescent probes) was  
871 prepared freshly before each hybridization. A hybridization chamber was prepared with  
872 moistened paper towels laid in a 15cm tissue culture plate. A single sheet of Parafilm was laid  
873 over the moistened paper towel. 50  $\mu$ L of hybridization buffer was pipetted onto the parafilm,  
874 and a coverslip inverted into the hybridization buffer. The chamber was sealed with parafilm and  
875 placed in a dry 37 °C oven for 4-16 hours. After hybridization, coverslips were placed back into  
876 a 12-well plate containing 1 mL Wash Buffer A and incubated twice for 20 minutes in a dry oven  
877 at 37 °C, with the second wash containing 300 nM DAPI. In a final wash step, cells were washed  
878 in Wash Buffer B (Biosearch Technologies). Coverslips were mounted on glass microscope  
879 slides in Vectashield mounting medium (Vector Laboratories) and the edges sealed with clear  
880 nail polish (Electron Microscopy Sciences). For experiments with combined  
881 immunofluorescence and FISH, primary antibody was added to the hybridization buffer at a  
882 concentration of 2  $\mu$ g/mL. An additional wash step with Wash Buffer A containing 1 $\mu$ g/mL anti-

883 mouse polyclonal antibody conjugated to AlexaFluor 647 was performed before DAPI staining,  
884 and incubated at 37°C for 20 minutes.

885 Samples were imaged on a custom built epifluorescence Nikon Eclipse microscope equipped  
886 with piezoelectric stage control and EMCCD camera (Andor), as well as custom-built filter sets  
887 corresponding to the wavelength of dye used. All samples were imaged the same day after  
888 hybridization and/or incubation with secondary antibody, and all samples to be quantitatively  
889 compared across coverslips were imaged on the same day using exactly the same illumination  
890 and acquisition settings to minimize coverslip-to-coverslip variation.

### 891 **Single Particle Tracking (spaSPT)**

892 Single particle tracking experiments were carried out as previously described (cit), but are  
893 described here in brief. After overnight growth, U2OS cells expressing Halo-RPB1 were labeled  
894 with 50 nM each of JF<sub>549</sub> and PA-JF<sub>646</sub>. Single molecules imaging was performed on a custom-  
895 built Nikon Ti microscope fitted with a 100x/NA 1.49 oil-immersion TIRF objective, motorized  
896 mirror are to allow HiLo illumination of the sample, Perfect Focus System, and two aligned EM-  
897 CCD cameras. Samples were illuminated using 405- nm (140 mW, OBIS coherent), 561-nm (1  
898 W, genesis coherent), and 633-nm (1 W, genesis coherent) lasers, which were focused onto the  
899 back pupil plane of the objective via fiber and multi-notch dichromatic mirror (405-nm/488-  
900 nm/561-nm/633-nm quad-band; Semrock, NF03-405/488/532/635E-25). Excitation intensity and  
901 pulse width were controlled through an acousto-optic transmission filter (AOTF nC-VIS-TN, AA  
902 Opto-Electronic) triggered using the camera's TTL exposure output signal. Fluorescence  
903 emissions were filtered with a single bandpass filter in front of the camera (Semrock 676/37 nm  
904 bandpass filter). All of the components of the microscope, camera, and other hardware were  
905 controlled through NIS-Elements software (Nikon).

906 For all spaSPT experiments, frames were acquired at a rate of 7.5 msec per frame (7 msec  
907 integration time plus 0.447 msec dead time). In order to obtain both the population-level  
908 distribution of the molecules for masking and the single trajectories, we used the following  
909 illumination scheme: First 100 frames with 561 nm light and continuous illumination were  
910 collected; then 20,000 frames with 633 nm light at 1 msec pulses per frame and 0.4 msec pulses  
911 of 405 nm light during the camera dead time; then 100 frames with 561 nm light and continuous  
912 illumination were collected. 405 nm illumination was optimized to achieve a mean density of ~  
913 0.5 localizations per camera frame.

### 914 **spaSPT data processing**

915 SPT data sets were processed in 4 general steps using a custom-written Matlab (Mathworks):  
916 1) Masks for RCs were annotated manually, 2) the masks were corrected for drift throughout the  
917 sample acquisition, 3) particles were localized and trajectories constructed, and 4) trajectories  
918 were sorted as “inside” compartments or “outside”.

919 First, the 100 frames at the beginning and the end of each movie were separately extracted  
920 and a maximum-intensity projection used to generate “before” and “after” images of the cell or  
921 cells in the field of view. These images would be used to correct for movement of the cell as well  
922 as the individual RCs. For each cell, the nucleus was annotated in the “before” image, and then  
923 again in the “after” image. We assumed that the cell movement over the ~4 minutes of  
924 acquisition was approximately linear, and calculated the drift-corrected nuclear boundary for  
925 every frame in the stack of SPT images. The same procedure was applied to each of the  
926 replication compartments. Particle localization and tracking were implemented based on an  
927 adapted version of the Multiple Target Tracking (MTT) algorithm, available at  
928 [https://gitlab.com/tjian-darzacq-lab/SPT\\_LocAndTrack](https://gitlab.com/tjian-darzacq-lab/SPT_LocAndTrack). In the first step, particles were identified



929 with the following input parameters: Window = 9 px; Error Rate =  $10^{-6.25}$ ; Deflation Loops = 0.  
930 Following detection, a mask generated from the drift-corrected nuclear boundary was applied to  
931 discard any detections not within the nucleus. Trajectories were reconstructed with the following  
932 parameters: Dmax =  $10 \mu\text{m}^2/\text{sec}$ ; Search exponent factor = 1.2; Max number of competitors = 3;  
933 Number of gaps allowed = 1.

934 Finally, after trajectories have been reconstructed, they were sorted as “inside” RCs or  
935 “outside”. To minimize the potential for bias in calling trajectories inside of compartments, we  
936 only required a single localization in a trajectory to fall within a compartment for that trajectory  
937 to be labeled as “inside”. As is discussed in the main text, we tested this sorting strategy for  
938 implicit bias by computationally generating mock RCs in uninfected or infected samples (Figure  
939 S3). To do this, all of the annotations for RCs from the infected samples ( $n = 817$ ), as well as the  
940 distribution of number of RCs per infected cell, were saved in a separate library. We then took  
941 the uninfected cells and, in a similar process as described above, annotated the nuclear boundary  
942 and nucleoli. We then randomly sampled from distribution of RCs per cell a number of RCs to  
943 place in the nucleus, and then from the library of annotations randomly chose these RCs and  
944 placed them in the nucleus by trial-and-error until all of the chosen RCs could be placed in the  
945 nucleus without overlapping with each other, a nucleolus, or the nuclear boundary (Figure S3A).  
946 The SPT data were then analyzed as above—drift-correction, followed by localization, building  
947 of trajectories, and sorting into compartments—using the exact same parameters. We also  
948 followed this same procedure of randomly choosing and placing artificial RCs in infected cells,  
949 this time avoiding previously annotated RCs instead of nucleoli (Figure S3B).

#### 950 **Two-state kinetic modeling using Spot-On**

951 We employed the Matlab version of Spot-On (available at <https://spoton.berkeley.edu>) in our  
952 analysis, and embedded this code into a custom-written Matlab routine. All data for a given  
953 condition were merged, and histograms of displacements were generated for between 1 and  $7 \Delta t$ .  
954 These histograms were fitted to a two-state kinetic model which assumes one immobile  
955 population and one freely diffusing population: Localization Error = 45 nm;  $D_{\text{free}} = [0.1 \mu\text{m}^2/\text{sec},$   
956  $5 \mu\text{m}^2/\text{sec}]$ ;  $D_{\text{bound}} = [0.001 \mu\text{m}^2/\text{sec}, 0.3 \mu\text{m}^2/\text{sec}]$ ; Fraction Bound = [0, 1]; UseWeights = 1;  
957 UseAllTraj = 0; JumpsToConsider = 4; TimePoints = 7; dZ = 0.700. Trajectory CDF data were  
958 fit to a two-state model as first outlined by Mazza and colleagues, and expanded with  
959 implementation in Hansen and colleagues.

960 Because of the sparsity of the data we collected, we could not reliably generate single-cell  
961 statistics. In order to estimate the variability in the data, we implemented a random subsampling  
962 approach where 15 cells from a particular condition were randomly chose and analyzed. The  
963  $D_{\text{free}}$ ,  $D_{\text{bound}}$ , and Fraction Bound were calculated for all trajectories, for trajectories inside of  
964 RCs, and for trajectories outside of RCs. This process was repeated 100 times, and the median  
965 values and standard deviations calculated and reported.

#### 966 **Analysis of angular distribution**

967 Angular distribution calculations were performed using a custom written routine in Matlab,  
968 implementing a previous version of this analysis (available at  
969 <https://gitlab.com/anders.sejr.hansen/anisotropy>). To analyze the angular distribution of  
970 trajectories in different conditions, we started with the list of trajectories generated above,  
971 annotated as either “inside” or “outside” of RCs. A trajectory of length N will have N-2 three-  
972 localization sets that form an angle, and so we built a matrix consisting of all consecutive three-  
973 localization sets. It is crucially important that only diffusing molecules be considered in the  
974 analysis, as localization error of bound molecules would skew all of the data to be highly

975 anisotropic. To address this, we used two criteria. First, we only applied a Hidden-Markov  
976 Model based trajectory classification approach to classify trajectories as either diffusing or bound  
977 (Persson et al., 2013), and kept only the trajectories that were annotated as diffusing. Second, we  
978 applied a hard threshold that both translocations (1 to 2, 2 to 3) had to be a minimum of 150 nm,  
979 which ensured that we could accurately compute the angle between them. Because a particle may  
980 diffuse into or outside of the annotated region, we counted a trajectory as “inside” only if the  
981 vertex of the angle occurred within an annotated region.

#### 982 **ATAC-seq**

983 ATAC-seq experiments were performed as previously described (Buenrostro et al., 2013).  
984 Briefly, 100,000 U2OS cells stably expressing HaloTag-RPB1 were plated and allowed to grow  
985 overnight. The following day, cells were infected as described above, and incubated either in  
986 complete medium, or complete medium supplemented with 300 µg/mL phosphonoacetic acid  
987 (PAA). Infections were timed such that all cells were harvested at once. All of the infected cell  
988 lines were then trypsinized, and 100,000 cells were transferred to separate eppendorff tubes.  
989 Cells were briefly centrifuged at 500 xg for 5 minutes at 4°C, and the supernatant discarded.  
990 After one wash with ice-cold PBS and another 5 minute spin at 500 xg and 4°C, cells were  
991 resuspended directly in tagmentation buffer (25µL 2x Buffer TD, 22.5 µL nuclease free water,  
992 2.5µL Tn5 (Illumina)) and incubated for 30 minutes at 37 °C. DNA extraction and amplification  
993 with barcodes were performed as previously described, with 10-16 total cycles amplification.  
994 Barcoded samples were pooled in equimolar amounts and sequenced using a full flow-cell of an  
995 Illumina Hi-Seq 2500 per replicate. Two replicates were performed. Sequenced reads were  
996 mapped separately to hg19 genome using Bowtie2 (Langmead and Salzberg, 2012) with the  
997 following parameters: --no-unal --local --very-sensitive-local --no-discordant --no-mixed --  
998 contain --overlap --dovetail --phred33. Reads were separately mapped to the HSV1 genome,  
999 JQ673480, using Bowtie2 with the following parameters: --no-unal --no-discordant --no-mixed -  
1000 -contain --overlap --dovetail --phred33. The bam files were converted to bigwig files and  
1001 visualized using IGV (Robinson et al., 2011). TSS plots were generated using Deeptools suite  
1002 (bamCoverage, computeMatrix, plotHeatmap tools) using UCSC TSS annotations for hg19  
1003 genome, and using a highly refined map of the gene starts in HSV1 kindly provided by Lars  
1004 Dölken (University of Cambridge, to be published separately).

#### 1005 **Oligopaint on infected cells**

1006 For DNA FISH experiments, custom pools of fluorescently labeled DNA oligos were  
1007 generated using previously published protocols (Beliveau et al., 2015; Boettiger et al., 2016).  
1008 Briefly, oligo sequences tiling a 10,016 bp region in the Unique Long arm (JQ673480 position  
1009 56,985 to 66,999) and a 7703 bp region in the Unique Short arm (JQ673480 position 133,305 to  
1010 141,007) were manually curated using oligo BLAST (NCBI) against the HSV1 and human  
1011 genomes with the following settings, following guidelines for T<sub>m</sub>, GC-content, and length from  
1012 previous Oligopaint protocols (Beliveau et al., 2012; Boettiger et al., 2016). Individual oligos  
1013 were synthesized and pooled. PCR was used to introduce a common T7 promoter on the 3' end  
1014 of the final probe sequence, then the PCR products were gel purified before *in vitro* transcription  
1015 to generate ssRNA complimentary to the hybridization sequence. Finally, the entire RNA pool  
1016 was reverse transcribed in a single reaction using Maxima RT (Thermo) using either AlexaFluor-  
1017 647 or AlexaFluor-555 5'-labeled oligos as the reverse transcription primer. After acid  
1018 hydrolysis to remove the RNA, oligos were purified using high binding capacity oligo cleanup  
1019 columns (Zymo) and resuspended in TE.

1020 Cells were plated on 18 mm coverslips and infected as described above. Infected was  
1021 allowed to progress for between 3 and 8 hours in the presence or absence of phosphonoacetic  
1022 acid, then fixed with 4% paraformaldehyde for 15 minutes. Coverslips were washed twice with  
1023 PBS, then incubated with 100mM Glycine in PBS for 10 minutes. Samples were permeabilized  
1024 for 15 minutes with 0.5% Triton-X100 in PBS, then washed twice with PBS. After  
1025 permeabilization, samples were treated with 100 mM HCl for 5 minutes, then washed twice with  
1026 PBS. Prior to hybridization, samples were washed twice with 2X SSC (300 mM NaCl, 30 mM  
1027 Sodium Citrate), and then incubated at 42 °C for 45 minutes in 2X SSC with 50% v/v  
1028 Formamide. Coverslips were inverted onto a slide containing 25  $\mu$ L hybridization buffer (300  
1029 mM NaCl, 30 mM Sodium Citrate, 20% w/v Dextran Sulfate, 50% v/v Formamide, and 75 pmol  
1030 of fluorescently-labeled oligos) and sealed with rubber cement. Samples were denatured at 78 °C  
1031 on an inverted heat block for 3 minutes, then incubated in a humidified chamber at 42°C for 16  
1032 hours. Samples were then removed from the glass slides and washed twice to 60 °C with pre-  
1033 warmed 2x SSC for 15 minutes, then washed twice with 0.4x SSC at room temperature for 15  
1034 minutes. Finally, coverslips were mounted on glass slides with Vectashield mounting medium.

1035 DNA FISH samples were imaged on the same microscope as described above for  
1036 immunofluorescence and RNA FISH. Z-stack images were collected from all the way below the  
1037 focal plane to all the way above the focal plane, with a step size of 100 nm. All samples were  
1038 imaged on the same day using the same illumination and acquisition settings to minimize  
1039 coverslip to coverslip differences.

#### 1040 **Analysis of Immunofluorescence, RNA, and DNA FISH**

1041 All cells were analyzed using a custom built Matlab script. First, a single image for each  
1042 color channel was generated by automatically identifying the focal plane of the stack, and then  
1043 integrating the pixel intensity for all pixels 1  $\mu$ m above and below the focal plane. Nuclei were  
1044 automatically segmented, but replication compartments could not reliably be detected using  
1045 simple thresholding, and so each was manually annotated. A region of the image was selected to  
1046 represent the black background, and the mean pixel value of this region was subtracted from  
1047 every pixel in the image. After segmentation, the pixel values for each nucleus were recorded, as  
1048 well as every RC within a given nucleus, and these were used to measure the signal within the  
1049 RC, as well as the fraction of signal within compared to the rest of the nucleus  
1050 (immunofluorescence only).

#### 1051 **Quantification of DNA content within RCs**

1052 DNA FISH data were compared with ATAC-seq data for the 6 hpi timepoint. Despite the fact  
1053 that U2OS are hypertriploid, we based all the calculations on the DNA content of a diploid cell.  
1054 As such, the values presented here likely represent an upper bound on the relative concentrations  
1055 of host and HSV1 gDNA for our experiments. Precise volume measurements for nuclei were  
1056 based on data from Monier et al., 2000, volumetric measurements for RCs were taken directly  
1057 from the annotations of the DNA FISH data. Measurement uncertainty was propagated following  
1058 standard practices outlined in Taylor, 1997.

#### 1059 **PALM of Pol II in RCs**

1060 For PALM experiments to precisely localize Pol II molecules within RCs, cells were labeled  
1061 with 500 nM PA-JF<sub>549</sub>, and then infected as described above. Cells were fixed in 4%  
1062 Paraformaldehyde in PBS, washed twice with PBS. Fluorescent 100 nm and 200 nm Tetraspek  
1063 beads were mixed in a 9:1 ratio then diluted 1000-fold in PBS. 100  $\mu$ L was added to each  
1064 coverslip and allowed to settle for 5 minutes, followed by 5 minutes of washing while rocking.



1065 Coverslips were mounted in Attofluor Cell Chambers and covered with PALM imaging buffer  
1066 (50 mM NaCl, 50 mM Tris pH 7.9, 2 mM Trolox) to reduce triplet-state blinking.

1067 Samples were imaged on a custom-built Nikon Ti microscope equipped similarly to the  
1068 microscope for single particle tracking, with some differences described here. An Adaptive  
1069 Optics module (MicAO) and a removable cylindrical lens were placed in the light path ahead of  
1070 the EM-CCD (Andor iXon Ultra 897) cameras in the left and right camera ports (respectively) of  
1071 the microscope. Astigmatism for precise 3D localization was introduced using the Adaptive  
1072 Optics system. The Adaptive Optics system was controlled through the MicAO software and  
1073 calibrated on 200 nM Tetraspek beads based on the total photon yield and point spread function  
1074 shape after iterative tuning of the deformable mirror. After optimization, a slight astigmatism in  
1075 the vertical Zernike mode (Astigmatism  $90^\circ = 0.060$ ) was added, and several z-stacks of 100 nM  
1076 Tetraspek beads with 10 nm between slices to calibrate the PSF shape with the Z-position.  
1077 30,000 frames were acquired with the 561 nm laser line and increasing amounts of 405 nm  
1078 illumination in order to keep the number of single molecules consistent across the duration of  
1079 acquisition.

1080 Spatial statistics were collected on cells using previously published methods (Boehning et al.,  
1081 2018). First, cell boundaries and replication compartments were annotated as for spaSPT  
1082 experiments (above). Particularly for small objects like RCs, edge correction is crucial for  
1083 accurate spatial point pattern statistics. Given a set of detections  $P$ , we used the estimator  $f$  to  
1084 correct for biases generated by points near the RC boundary:

$$1085 \quad f(i, j, r) = \begin{cases} 0, & \text{if } d(i, j) > r \\ \frac{2\pi d(i, j)}{C_{in}}, & \text{otherwise} \end{cases}$$

1086 where  $d(i, j)$  is the distance between points  $i$  and  $j$  for  $i, j \in P$ , and  $C_{in}$  is arclength of the part of  
1087 the circle of  $d(i, j)$  centered on  $i$  which is inside the annotated region (Goreaud and Pélissier,  
1088 1999). We then calculated  $N(r)$ , the local neighborhood density:

$$1089 \quad N(r) = \frac{1}{N_p} \sum_{i \in P} \sum_{i \neq j} f(i, j, r)$$

1090 where  $N_p$  is the total number of detections within the region (Goreaud and Pélissier, 1999).

1091 The modified L-function is compared to complete spatial randomness (CSR), a homogenous  
1092 Poisson process with intensity  $\lambda$ , equal to the density of detections in the region of interest  $A$ .  
1093 The K-Ripley function is defined as:

$$1094 \quad K(r) = \frac{N(r)}{\lambda}$$

1095 (Ripley, 1977). We estimated the modified L-function given by:

$$1096 \quad L(r) - r = \sqrt{\frac{K(r)}{\pi}} - r$$

1097 (Goreaud and Pélissier, 1999). For the modified L-function, a spatial distribution with CSR  
1098 remains at 0 for all radii. To implement this analysis, we used a previously published python  
1099 script and the ADS R package to estimate the spatial statistics (Boehning et al., 2018; Pélissier  
1100 and Goreaud, 2015). In order to estimate the error in our measurements, for each cell we  
1101 performed random subsampling of the data, before annotation, to randomly select 25,000  
1102 detections 100 times, and fed these subsampled data to the R script computing the statistic.

1103 **STORM on infected cells**

1104 For STORM experiments to visualize both RNA Polymerase II and the viral DNA, U2OS  
1105 cells stably expressing Halo-RPB1 were plated on coverslips, labeled with 300 nM JF<sub>549</sub>, and  
1106 infected with the UL2/50 virus strain (Dembowski and DeLuca, 2015) as described above. After  
1107 infection incubation with virus, cells were transferred into complete medium containing 300  
1108 µg/mL PAA for two hours to prevent replication. After two hours, cells were released from  
1109 inhibition by exchanging the culture medium with complete medium containing 2.5 µM 5-  
1110 Ethynyldeoxyuridine for 4 hours. Cells were fixed with 4% Paraformaldehyde in PBS for 10  
1111 minutes, then permeabilized with 0.5% Triton X100 in PBS for 10 minutes. Copper(1)-catalyzed  
1112 alkyne-azide cycloaddition was performed with the ClickIT imaging kit following the  
1113 manufacturer's protocol (Thermo). Coverslips were mounted in Attofluor Cell Chambers and  
1114 covered with freshly-made STORM buffer (50 mM NaCl, 50 mM Tris pH 7.9, 10% D-glucose,  
1115 10 mM DTT, 700 µg/mL Glucose Oxidase (Sigma), and 4 µg/mL catalase). STORM  
1116 experiments were performed on the same microscope described for PALM.

### 1117 **Data and Software Availability**

1118 The GEO accession number for the ATAC-seq data is: [GSE117335](https://www.ncbi.nlm.nih.gov/geo/query/acc.cgi?acc=GSE117335). The SPT trajectory data  
1119 are available via Zenodo at DOI:10.5281/zenodo.1313872. The software used to generate these  
1120 data is available at <https://gitlab.com/tjian-darzacq-lab>.

### 1121 **References**

- 1122 Abrisch, R.G., Eidem, T.M., Yakovchuk, P., Kugel, J.F., and Goodrich, J.A. (2015). Infection by  
1123 Herpes Simplex Virus Type-1 Causes Near-Complete Loss of RNA Polymerase II  
1124 Occupancy on the Host Cell Genome. *J. Virol.* JVI.02665-15.
- 1125 Alekseev, S., Nagy, Z., Sandoz, J., Weiss, A., Egly, J., Le May, N., and Coin, F. (2017).  
1126 Transcription without XPB Establishes a Unified Helicase-Independent Mechanism of  
1127 Promoter Opening in Eukaryotic Gene Expression. *Mol. Cell* 65, 504–514.e4.
- 1128 Amitai, A. (2018). Chromatin Configuration Affects the Dynamics and Distribution of a  
1129 Transiently Interacting Protein. *Biophys. J.* 114, 766–771.
- 1130 Annibale, P., Vanni, S., Scarselli, M., Rothlisberger, U., and Radenovic, A. (2011). Identification  
1131 of clustering artifacts in photoactivated localization microscopy. *Nat. Methods* 8, 527–528.
- 1132 Banani, S.F., Lee, H.O., Hyman, A.A., and Rosen, M.K. (2017). Biomolecular condensates:  
1133 organizers of cellular biochemistry. *Nat. Rev. Mol. Cell Biol.* 18, 285–298.
- 1134 Beliveau, B.J., Joyce, E.F., Apostolopoulos, N., Yilmaz, F., Fonseka, C.Y., McCole, R.B.,  
1135 Chang, Y., Li, J.B., Senaratne, T.N., Williams, B.R., et al. (2012). Versatile design and  
1136 synthesis platform for visualizing genomes with Oligopaint FISH probes. *Proc. Natl. Acad.*  
1137 *Sci.* 109, 21301–21306.
- 1138 Beliveau, B.J., Boettiger, A.N., Avendaño, M.S., Jungmann, R., McCole, R.B., Joyce, E.F., Kim-  
1139 Kiselak, C., Bantignies, F., Fonseka, C.Y., Erceg, J., et al. (2015). Single-molecule super-  
1140 resolution imaging of chromosomes and in situ haplotype visualization using Oligopaint  
1141 FISH probes. *Nat. Commun.* 6, 7147.
- 1142 Berg, O.G., Winter, R.B., and von Hippel, P.H. (1981). Diffusion-Driven Mechanisms of Protein

- 1143 Translocation on Nucleic Acids. 1. Models and Theory. *Biochemistry* 20, 6929–6948.
- 1144 Bergeron-Sandoval, L.-P., Safaee, N., and Michnick, S.W. (2016). Mechanisms and  
1145 Consequences of Macromolecular Phase Separation. *Cell* 165, 1067–1079.
- 1146 Betzig, E., Patterson, G.H., Sougrat, R., Lindwasser, O.W., Olenych, S., Bonifacino, J.S.,  
1147 Davidson, M.W., Lippincott-Schwartz, J., and Hess, H.F. (2006). Imaging intracellular  
1148 fluorescent proteins at nanometer resolution. *Science* 313, 1642–1645.
- 1149 Blaho, J.A., Morton, E.R., and Yedowitz, J.C. (2005). Herpes Simplex Virus: Propagation,  
1150 Quantification, and Storage. *Curr. Protoc. Microbiol.* 0–23.
- 1151 Bloom, D.C., Giordani, N. V., and Kwiatkowski, D.L. (2010). Epigenetic regulation of latent  
1152 HSV-1 gene expression. *Biochim. Biophys. Acta - Gene Regul. Mech.* 1799, 246–256.
- 1153 Boehning, M., Dugast-Darzacq, C., Rankovic, M., Hansen, A.S., Yu, T.-K., Marie-Nelly, H.,  
1154 Kokic, G., Dailey, G.M., Cramer, P., Darzacq, X., et al. (2018). RNA polymerase II  
1155 clustering through CTD phase separation. *BioRxiv*.
- 1156 Boettiger, A.N., Bintu, B., Moffitt, J.R., Wang, S., Beliveau, B.J., Fudenberg, G., Imakaev, M.,  
1157 Mirny, L.A., Wu, C., and Zhuang, X. (2016). Super-resolution imaging reveals distinct  
1158 chromatin folding for different epigenetic states. *Nature* 529, 418–422.
- 1159 Bolintineanu, D.S., Volzing, K., Vivcharuk, V., Sayyed-Ahmad, A., Srivastava, P., and  
1160 Kaznessis, Y.N. (2014). Investigation of Changes in Tetracycline Repressor Binding upon  
1161 Mutations in the Tetracycline Operator. *J. Chem. Eng. Data* 59, 3167–3176.
- 1162 Brangwynne, C.P., Mitchison, T.J., and Hyman, A.A. (2011). Active liquid-like behavior of  
1163 nucleoli determines their size and shape in *Xenopus laevis* oocytes. *Proc. Natl. Acad. Sci.*  
1164 108, 4334–4339.
- 1165 Buenrostro, J.D., Giresi, P.G., Zaba, L.C., Chang, H.Y., and Greenleaf, W.J. (2013).  
1166 Transposition of native chromatin for fast and sensitive epigenomic profiling of open  
1167 chromatin, DNA-binding proteins and nucleosome position. *Nat. Methods* 10, 1213–1218.
- 1168 Chang, L., Godinez, W.J., Kim, I.-H., Tektonidis, M., de Lanerolle, P., Eils, R., Rohr, K., and  
1169 Knipe, D.M. (2011). Herpesviral replication compartments move and coalesce at nuclear  
1170 speckles to enhance export of viral late mRNA. *Proc. Natl. Acad. Sci. U. S. A.* 108, E136–  
1171 E144.
- 1172 Chao, S.H., and Price, D.H. (2001). Flavopiridol Inactivates P-TEFb and Blocks Most RNA  
1173 Polymerase II Transcription in Vivo. *J. Biol. Chem.* 276, 31793–31799.
- 1174 Chen, F., Gao, X., Shilatifard, A., and Shilatifard, A. (2015). Stably paused genes revealed  
1175 through inhibition of transcription initiation by the TFIID inhibitor triptolide. *Genes Dev.* 29,  
1176 39–47.
- 1177 Chen, J., Zhang, Z., Li, L., Chen, B.-C., Revyakin, A., Hajj, B., Legant, W., Dahan, M., Lionnet,  
1178 T., Betzig, E., et al. (2014). Single-molecule dynamics of enhanceosome assembly in  
1179 embryonic stem cells. *Cell* 156, 1274–1285.
- 1180 Cho, W.-K., Spille, J.-H., Hecht, M., Lee, C., Li, C., Grube, V., and Cisse, I.I. (2018). Mediator  
1181 and RNA polymerase II clusters associate in transcription-dependent condensates. *Science*

- 1182 4199, eaar4199.
- 1183 Chong, S., Dugast-Darzacq, C., Liu, Z., Dong, P., Dailey, G.M., Cattoglio, C., Heckert, A.,  
1184 Banala, S., Lavis, L., Darzacq, X., et al. (2018). Imaging dynamic and selective low-  
1185 complexity domain interactions that control gene transcription. *Science* 2555, eaar2555.
- 1186 Cisse, I.I., Izeddin, I., Causse, S.Z., Boudarene, L., Senecal, A., Muresan, L., Dugast-Darzacq,  
1187 C., Hajj, B., Dahan, M., and Darzacq, X. (2013). Real-time dynamics of RNA polymerase II  
1188 clustering in live human cells. *Science* 341, 664–667.
- 1189 Cortini, R., and Filion, G.J. (2018). Theoretical principles of transcription factor traffic on folded  
1190 chromatin. *Nat. Commun.* 9, 1740.
- 1191 Courchaine, E.M., Lu, A., and Neugebauer, K.M. (2016). Droplet organelles? *EMBO J.* 35,  
1192 1603–1612.
- 1193 Darzacq, X., Shav-Tal, Y., de Turris, V., Brody, Y., Shenoy, S.M., Phair, R.D., and Singer, R.H.  
1194 (2007). In vivo dynamics of RNA polymerase II transcription. *Nat. Struct. Mol. Biol.* 14,  
1195 796–806.
- 1196 Davis, Z.H., Verschuere, E., Jang, G.M., Kleffman, K., Johnson, J.R., Park, J., Von Dollen, J.,  
1197 Maher, M.C., Johnson, T., Newton, W., et al. (2015). Global Mapping of Herpesvirus-Host  
1198 Protein Complexes Reveals a Transcription Strategy for Late Genes. *Mol. Cell* 57, 349–360.
- 1199 Dembowski, J. a., and DeLuca, N.A. (2015). Selective Recruitment of Nuclear Factors to  
1200 Productively Replicating Herpes Simplex Virus Genomes. *PLOS Pathog.* 11, e1004939.
- 1201 Dosztanyi, Z., Csizmok, V., Tompa, P., and Simon, I. (2005). IUPred: web server for the  
1202 prediction of intrinsically unstructured regions of proteins based on estimated energy content.  
1203 *Bioinformatics* 21, 3433–3434.
- 1204 Dosztányi, Z., Csizmók, V., Tompa, P., and Simon, I. (2005). The pairwise energy content  
1205 estimated from amino acid composition discriminates between folded and intrinsically  
1206 unstructured proteins. *J. Mol. Biol.* 347, 827–839.
- 1207 Eriksson, B.F., and Schinazi, R.F. (1989). Combinations of 3'-azido-3'-deoxythymidine  
1208 (zidovudine) and phosphonoformate (foscarnet) against human immunodeficiency virus type  
1209 1 and cytomegalovirus replication in vitro. *Antimicrob. Agents Chemother.* 33, 663–669.
- 1210 Everett, R.D. (2000). ICP0, a regulator of herpes simplex virus during lytic and latent infection.  
1211 *Bioessays* 22, 761–770.
- 1212 Feric, M., Vaidya, N., Harmon, T.S., Mitrea, D.M., Zhu, L., Richardson, T.M., Kriwacki, R.W.,  
1213 Pappu, R.V., and Brangwynne, C.P. (2016). Coexisting Liquid Phases Underlie Nucleolar  
1214 Subcompartments. *Cell* 165, 1686–1697.
- 1215 Goreaud, F., and Pélissier, R. (1999). On explicit formulas of edge effect correction for Ripley's  
1216 K -function. *J. Veg. Sci.* 10, 433–438.
- 1217 Grimm, J.B., English, B.P., Chen, J., Slaughter, J.P., Zhang, Z., Revyakin, A., Patel, R., Macklin,  
1218 J.J., Normanno, D., Singer, R.H., et al. (2015). A general method to improve fluorophores for  
1219 live-cell and single-molecule microscopy. *Nat. Methods* 12.
- 1220 Grimm, J.B., English, B.P., Choi, H., Muthusamy, A.K., Mehl, B.P., Dong, P., Brown, T.A.,

- 1221 Lippincott-Schwartz, J., Liu, Z., Lionnet, T., et al. (2016). Bright photoactivatable  
1222 fluorophores for single-molecule imaging. *Nat. Methods* *13*, 985–988.
- 1223 Hansen, A.S., Pustova, I., Cattoglio, C., Tjian, R., and Darzacq, X. (2017). CTCF and cohesin  
1224 regulate chromatin loop stability with distinct dynamics. *Elife* *6*, 1–33.
- 1225 Hansen, A.S., Woringer, M., Grimm, J.B., Lavis, L.D., Tjian, R., and Darzacq, X. (2018).  
1226 Robust model-based analysis of single-particle tracking experiments with Spot-On. *Elife* *7*,  
1227 1–33.
- 1228 Hew, K., Dahlroth, S.-L., Nordlund, P., Cornvik, T., and Pan, L.X. (2015). VP22 core domain  
1229 from Herpes simplex virus 1 reveals a surprising structural conservation in both the Alpha-  
1230 and Gammaherpesvirinae subfamilies. *J. Gen. Virol.* *96*, 1436–1445.
- 1231 Hnisz, D., Shrinivas, K., Young, R.A., Chakraborty, A.K., and Sharp, P.A. (2017). A Phase  
1232 Separation Model for Transcriptional Control. *Cell* *169*, 13–23.
- 1233 Hyman, A.A., Weber, C.A., and Jülicher, F. (2014). Liquid-Liquid Phase Separation in Biology.  
1234 *Annu. Rev. Cell Dev. Biol.* *30*, 39–58.
- 1235 Izeddin, I., El Beheiry, M., Andilla, J., Ciepielewski, D., Darzacq, X., and Dahan, M. (2012).  
1236 PSF shaping using adaptive optics for three-dimensional single-molecule super-resolution  
1237 imaging and tracking. *Opt. Express* *20*, 4957.
- 1238 Izeddin, I., Récamier, V., Bosanac, L., Cisse, I.I., Boudarene, L., Dugast-Darzacq, C., Proux, F.,  
1239 Bénichou, O., Voituriez, R., Bensaude, O., et al. (2014). Single-molecule tracking in live  
1240 cells reveals distinct target-search strategies of transcription factors in the nucleus. *Elife*  
1241 e02230.
- 1242 Jonkers, I., Kwak, H., and Lis, J.T. (2014). Genome-wide dynamics of Pol II elongation and its  
1243 interplay with promoter proximal pausing, chromatin, and exons. *Elife* *2014*, 1–25.
- 1244 Knipe, D.M., and Cliffe, A. (2008). Chromatin control of herpes simplex virus lytic and latent  
1245 infection. *Nat. Rev. Microbiol.* *6*, 211–221.
- 1246 Lang, F., Li, X., Vladimirova, O., Hu, B., Chen, G., Xiao, Y., Singh, V., Lu, D., Li, L., Han, H.,  
1247 et al. (2017). CTCF interacts with the lytic HSV-1 genome to promote viral transcription.  
1248 *Sci. Rep.* *7*, 39861.
- 1249 Langmead, B., and Salzberg, S.L. (2012). Fast gapped-read alignment with Bowtie 2. *Nat.*  
1250 *Methods* *9*, 357–359.
- 1251 Lee, J.S., Raja, P., and Knipe, D.M. (2016). Herpesviral ICP0 Protein Promotes Two Waves of  
1252 Heterochromatin Removal on an Early Viral Promoter during Lytic Infection. *MBio* *7*,  
1253 e02007-15.
- 1254 Lester, J.T., and DeLuca, N.A. (2011). Herpes Simplex Virus 1 ICP4 Forms Complexes with  
1255 TFIID and Mediator in Virus-Infected Cells. *J. Virol.* *85*, 5733–5744.
- 1256 Li, D., Fu, W., and Swaminathan, S. (2018). Continuous DNA replication is required for late  
1257 gene transcription and maintenance of replication compartments in gammaherpesviruses.  
1258 *PLOS Pathog.* *14*, e1007070.
- 1259 Lin, Y., Mori, E., Kato, M., Xiang, S., Wu, L., Kwon, I., and McKnight, S.L. (2016). Toxic PR



- 1260 Poly-Dipeptides Encoded by the C9orf72 Repeat Expansion Target LC Domain Polymers.  
1261 *Cell* 167, 789–802.e12.
- 1262 Los, G. V, Encell, L.P., McDougall, M.G., Hartzell, D.D., Karassina, N., Zimprich, C., Wood,  
1263 M.G., Learish, R., Ohana, R.F., Urh, M., et al. (2008). HaloTag: A Novel Protein Labeling  
1264 Technology for Cell Imaging and Protein Analysis. *ACS Chem. Biol.* 3, 373–382.
- 1265 Lu, H., Yu, D., Hansen, A.S., Ganguly, S., Liu, R., Heckert, A., Darzacq, X., and Zhou, Q.  
1266 (2018). Phase-separation mechanism for C-terminal hyperphosphorylation of RNA  
1267 polymerase II. *Nature* 558, 318–323.
- 1268 Mirny, L.A. (2010). Nucleosome-mediated cooperativity between transcription factors. *Proc.*  
1269 *Natl. Acad. Sci.* 107, 22534–22539.
- 1270 Mirny, L., Slutsky, M., Wunderlich, Z., Tafvizi, A., Leith, J., and Kosmrlj, A. (2009). How a  
1271 protein searches for its site on DNA: the mechanism of facilitated diffusion. *J. Phys. A Math.*  
1272 *Theor.* 42, 434013.
- 1273 Monier, K., Armas, J.C., Etteldorf, S., Ghazal, P., and Sullivan, K.F. (2000). Annexation of the  
1274 interchromosomal space during viral infection. *Nat. Cell Biol.* 2, 661–665.
- 1275 Muylaert, I., and Elias, P. (2007). Knockdown of DNA ligase IV/XRCC4 by RNA interference  
1276 inhibits herpes simplex virus type I DNA replication. *J. Biol. Chem.* 282, 10865–10872.
- 1277 Nicovich, P.R., Owen, D.M., and Gaus, K. (2017). Turning single-molecule localization  
1278 microscopy into a quantitative bioanalytical tool. *Nat. Protoc.* 12, 453–461.
- 1279 Normanno, D., Boudarène, L., Dugast-Darzacq, C., Chen, J., Richter, C., Proux, F., Bénichou,  
1280 O., Voituriez, R., Darzacq, X., and Dahan, M. (2015). Probing the target search of DNA-  
1281 binding proteins in mammalian cells using TetR as model searcher. *Nat. Commun.* 6, 7357.
- 1282 Pélissier, R., and Goreaud, F. (2015). ads Package for R: A Fast Unbiased Implementation of the  
1283 K-function Family for Studying Spatial Point Patterns in Irregular-Shaped Sampling  
1284 Windows. *J. Stat. Softw.* 63.
- 1285 Persson, F., Lindén, M., Unoson, C., and Elf, J. (2013). Extracting intracellular diffusive states  
1286 and transition rates from single-molecule tracking data. *Nat. Methods* 10, 265–269.
- 1287 Pfoh, R., Lacdao, I.K., Georges, A.A., Capar, A., Zheng, H., Frappier, L., and Saridakis, V.  
1288 (2015). Crystal Structure of USP7 Ubiquitin-like Domains with an ICP0 Peptide Reveals a  
1289 Novel Mechanism Used by Viral and Cellular Proteins to Target USP7. *PLoS Pathog.* 11, 1–  
1290 23.
- 1291 Rajčáni, J., Andrea, V., and Ingeborg, R. (2004). Peculiarities of herpes simplex virus (HSV)  
1292 transcription: An overview. *Virus Genes* 28, 293–310.
- 1293 Rice, S. a, Long, M.C., Lam, V., and Spencer, C. a (1994). RNA polymerase II is aberrantly  
1294 phosphorylated and localized to viral replication compartments following herpes simplex  
1295 virus infection. *J. Virol.* 68, 988–1001.
- 1296 Ripley, B.D. (1977). Modelling Spatial Patterns. *J. R. Stat. Soc. Ser. B* 39, 172–212.
- 1297 Robinson, J.T., Thorvaldsdóttir, H., Winckler, W., Guttman, M., Lander, E.S., Getz, G., and  
1298 Mesirov, J.P. (2011). Integrative genomics viewer. *Nat. Biotechnol.* 29, 24–26.

- 1299 Rust, M.J., Bates, M., and Zhuang, X. (2006). Sub-diffraction-limit imaging by stochastic optical  
1300 reconstruction microscopy (STORM). *Nat. Methods* 3, 793–795.
- 1301 Rutkowski, A.J., Erhard, F., L’Hernault, A., Bonfert, T., Schilhabel, M., Crump, C., Rosenstiel,  
1302 P., Efstathiou, S., Zimmer, R., Friedel, C.C., et al. (2015). Widespread disruption of host  
1303 transcription termination in HSV-1 infection. *Nat. Commun.* 6, 7126.
- 1304 Sabari, B.R., Dall’Agnese, A., Bojja, A., Klein, I.A., Coffey, E.L., Shrinivas, K., Abraham, B.J.,  
1305 Hannett, N.M., Zamudio, A. V, Manteiga, J.C., et al. (2018). Coactivator condensation at  
1306 super-enhancers links phase separation and gene control. *Science* 3958, eaar3958.
- 1307 Schmid, M., Speiseder, T., Dobner, T., and Gonzalez, R.A. (2014). DNA Virus Replication  
1308 Compartments. *J. Virol.* 88, 1404–1420.
- 1309 Shao, W., and Zeitlinger, J. (2017). Paused RNA polymerase II inhibits new transcriptional  
1310 initiation. *Nat. Genet.* 49, 1045–1051.
- 1311 Shin, Y., Berry, J., Pannucci, N., Haataja, M.P., Toettcher, J.E., and Brangwynne, C.P. (2017).  
1312 Spatiotemporal Control of Intracellular Phase Transitions Using Light-Activated  
1313 optoDroplets. *Cell* 168, 159–171.e14.
- 1314 Strom, A.R., Emelyanov, A. V., Mir, M., Fyodorov, D. V., Darzacq, X., and Karpen, G.H.  
1315 (2017). Phase separation drives heterochromatin domain formation. *Nat. Publ. Gr.* 547, 241–  
1316 245.
- 1317 Taylor, J.R. (1997). *An Introduction to Error Analysis: The Study of Uncertainties in Physical*  
1318 *Measurements* (Sausalito, CA: University Science Books).
- 1319 Taylor, T.J., and Knipe, D.M. (2004). Proteomics of herpes simplex virus replication  
1320 compartments: association of cellular DNA replication, repair, recombination, and chromatin  
1321 remodeling proteins with ICP8. *J. Virol.* 78, 5856–5866.
- 1322 Taylor, T.J., McNamee, E.E., Day, C., and Knipe, D.M. (2003). Herpes simplex virus replication  
1323 compartments can form by coalescence of smaller compartments. *Virology* 309, 232–247.
- 1324 Teves, S.S., An, L., Bhargava-Shah, A., Xie, L., Darzacq, X., and Tjian, R. (2018). A stable  
1325 mode of bookmarking by TBP recruits RNA Polymerase II to mitotic chromosomes. *Elife* 7.
- 1326 Thurman, R.E., Rynes, E., Humbert, R., Vierstra, J., Maurano, M.T., Haugen, E., Sheffield,  
1327 N.C., Stergachis, A.B., Wang, H., Vernot, B., et al. (2012). The accessible chromatin  
1328 landscape of the human genome. *Nature* 489, 75–82.
- 1329 Titov, D. V., Gilman, B., He, Q.-L., Bhat, S., Low, W.-K., Dang, Y., Smeaton, M., Demain,  
1330 A.L., Miller, P.S., Kugel, J.F., et al. (2011). XPB, a subunit of TFIIH, is a target of the  
1331 natural product triptolide. *Nat. Chem. Biol.* 7, 182–188.
- 1332 Torigoe, S.E., Urwin, D.L., Ishii, H., Smith, D.E., and Kadonaga, J.T. (2011). Identification of a  
1333 Rapidly Formed Nonnucleosomal Histone-DNA Intermediate that Is Converted into  
1334 Chromatin by ACF. *Mol. Cell* 43, 638–648.
- 1335 Tunnicliffe, R.B., Schacht, M., Levy, C., Jowitt, T.A., Sandri-Goldin, R.M., and Golovanov,  
1336 A.P. (2015). The structure of the folded domain from the signature multifunctional protein  
1337 ICP27 from herpes simplex virus-1 reveals an intertwined dimer. *Sci. Rep.* 5, 11234.



1338 Zhou, C., and Knipe, D.M. (2002). Association of herpes simplex virus type 1 ICP8 and ICP27  
1339 proteins with cellular RNA polymerase II holoenzyme. *J. Virol.* 76, 5893–5904.

1340

## Figure 1

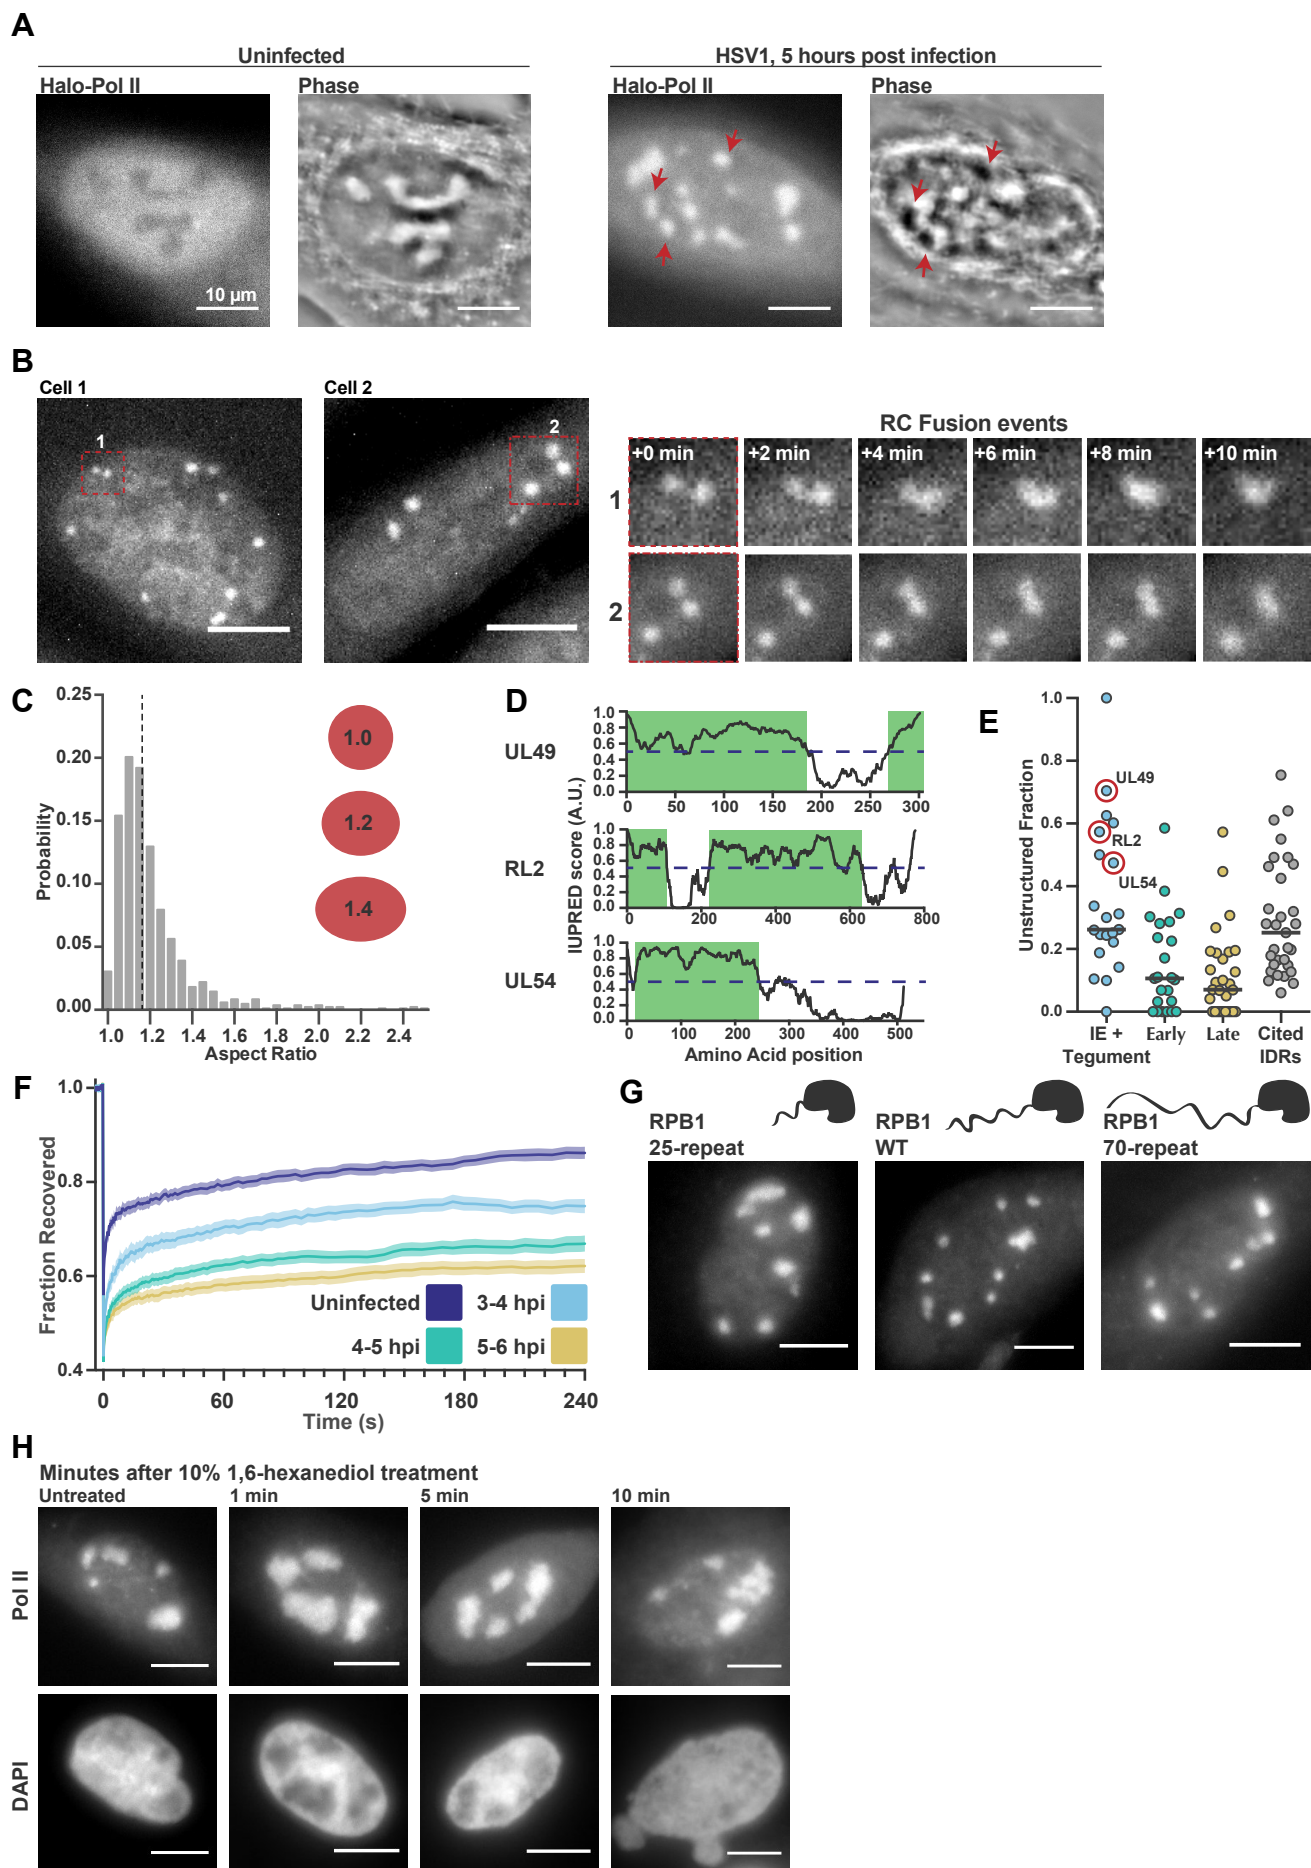

## Figure 2

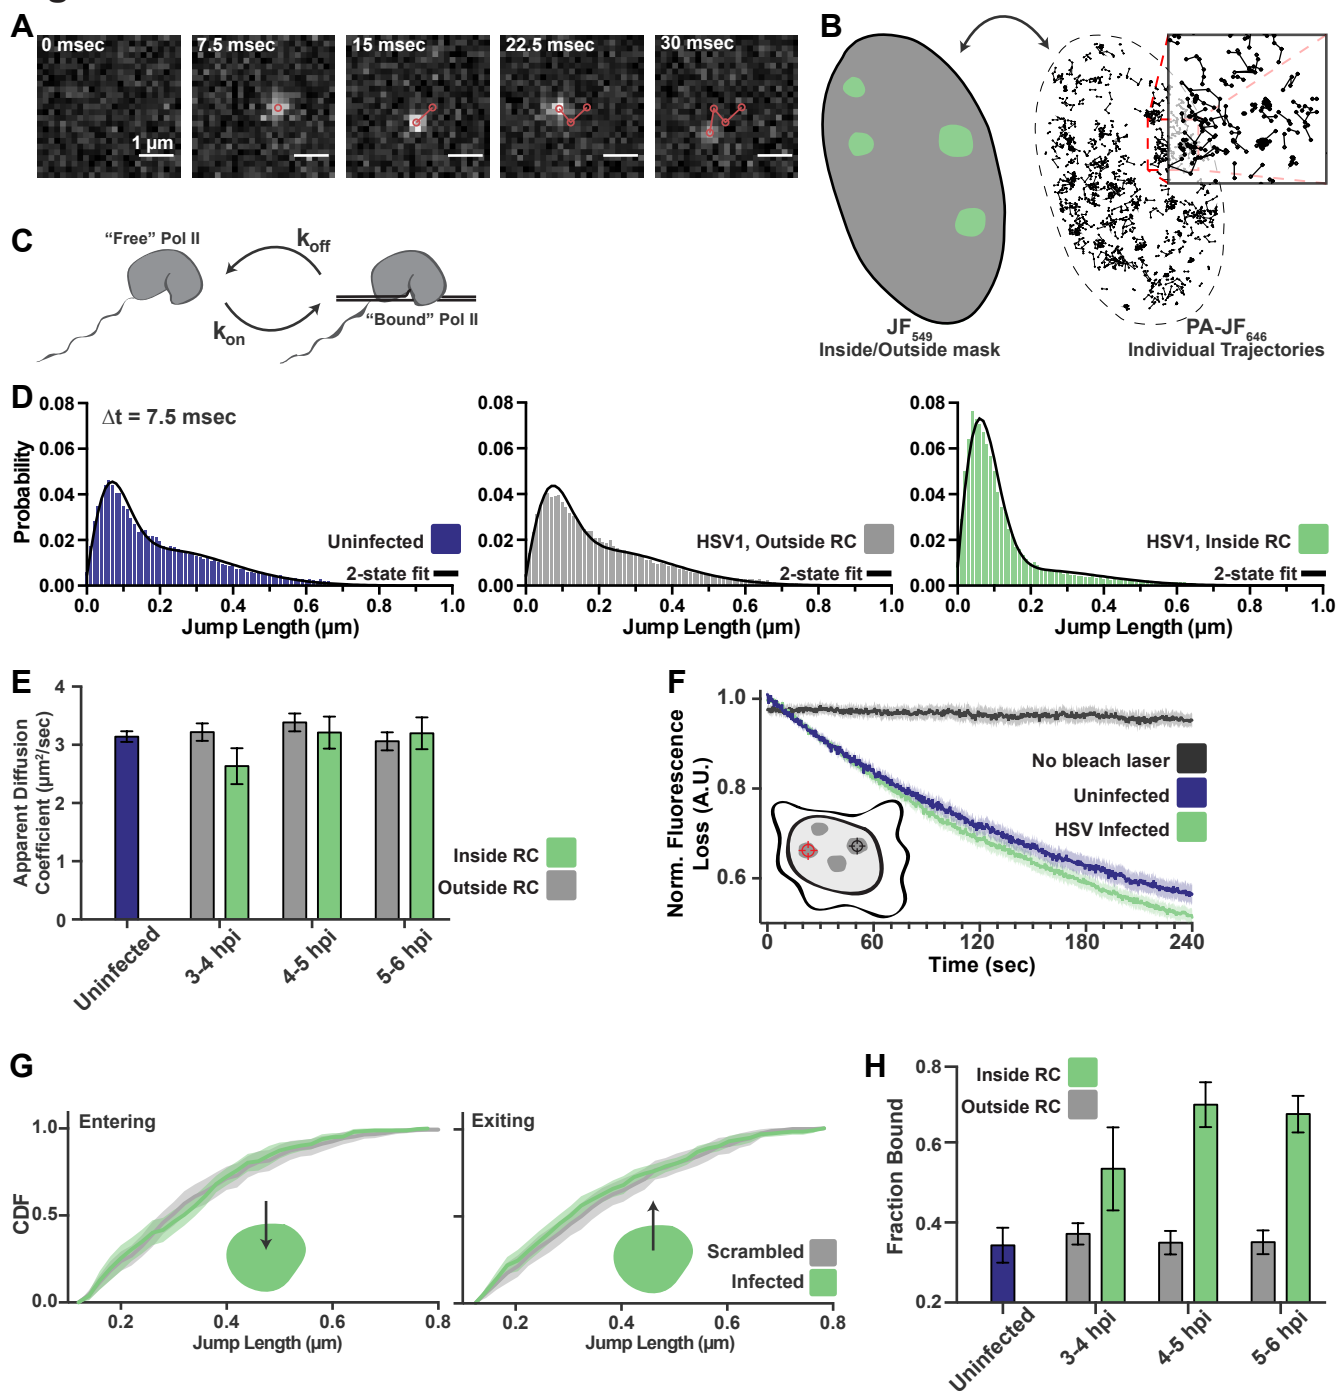

## Figure 3

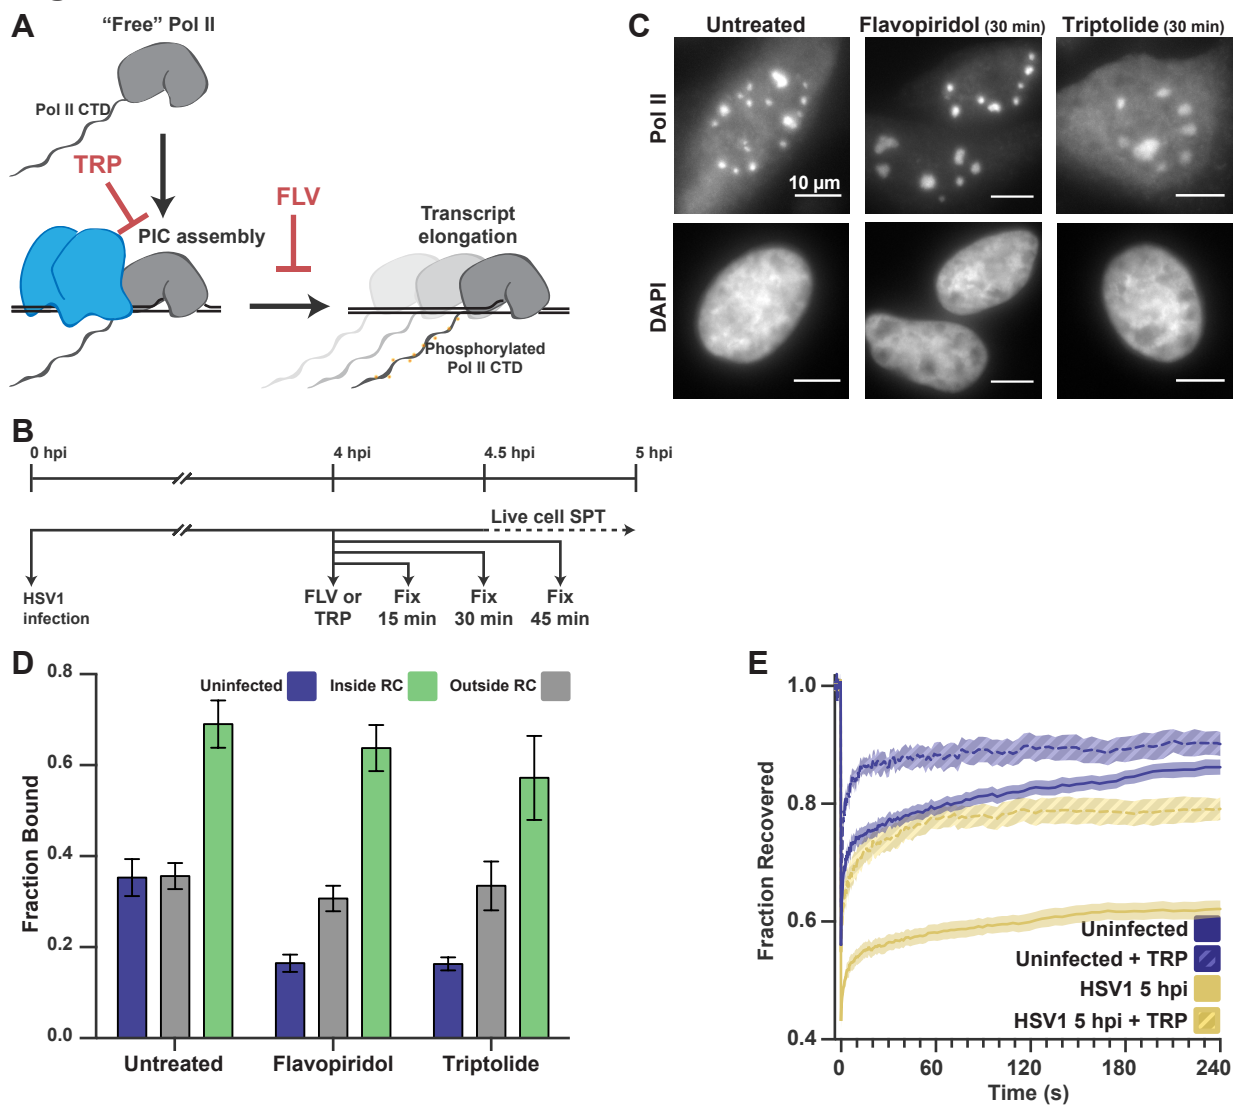

## Figure 4

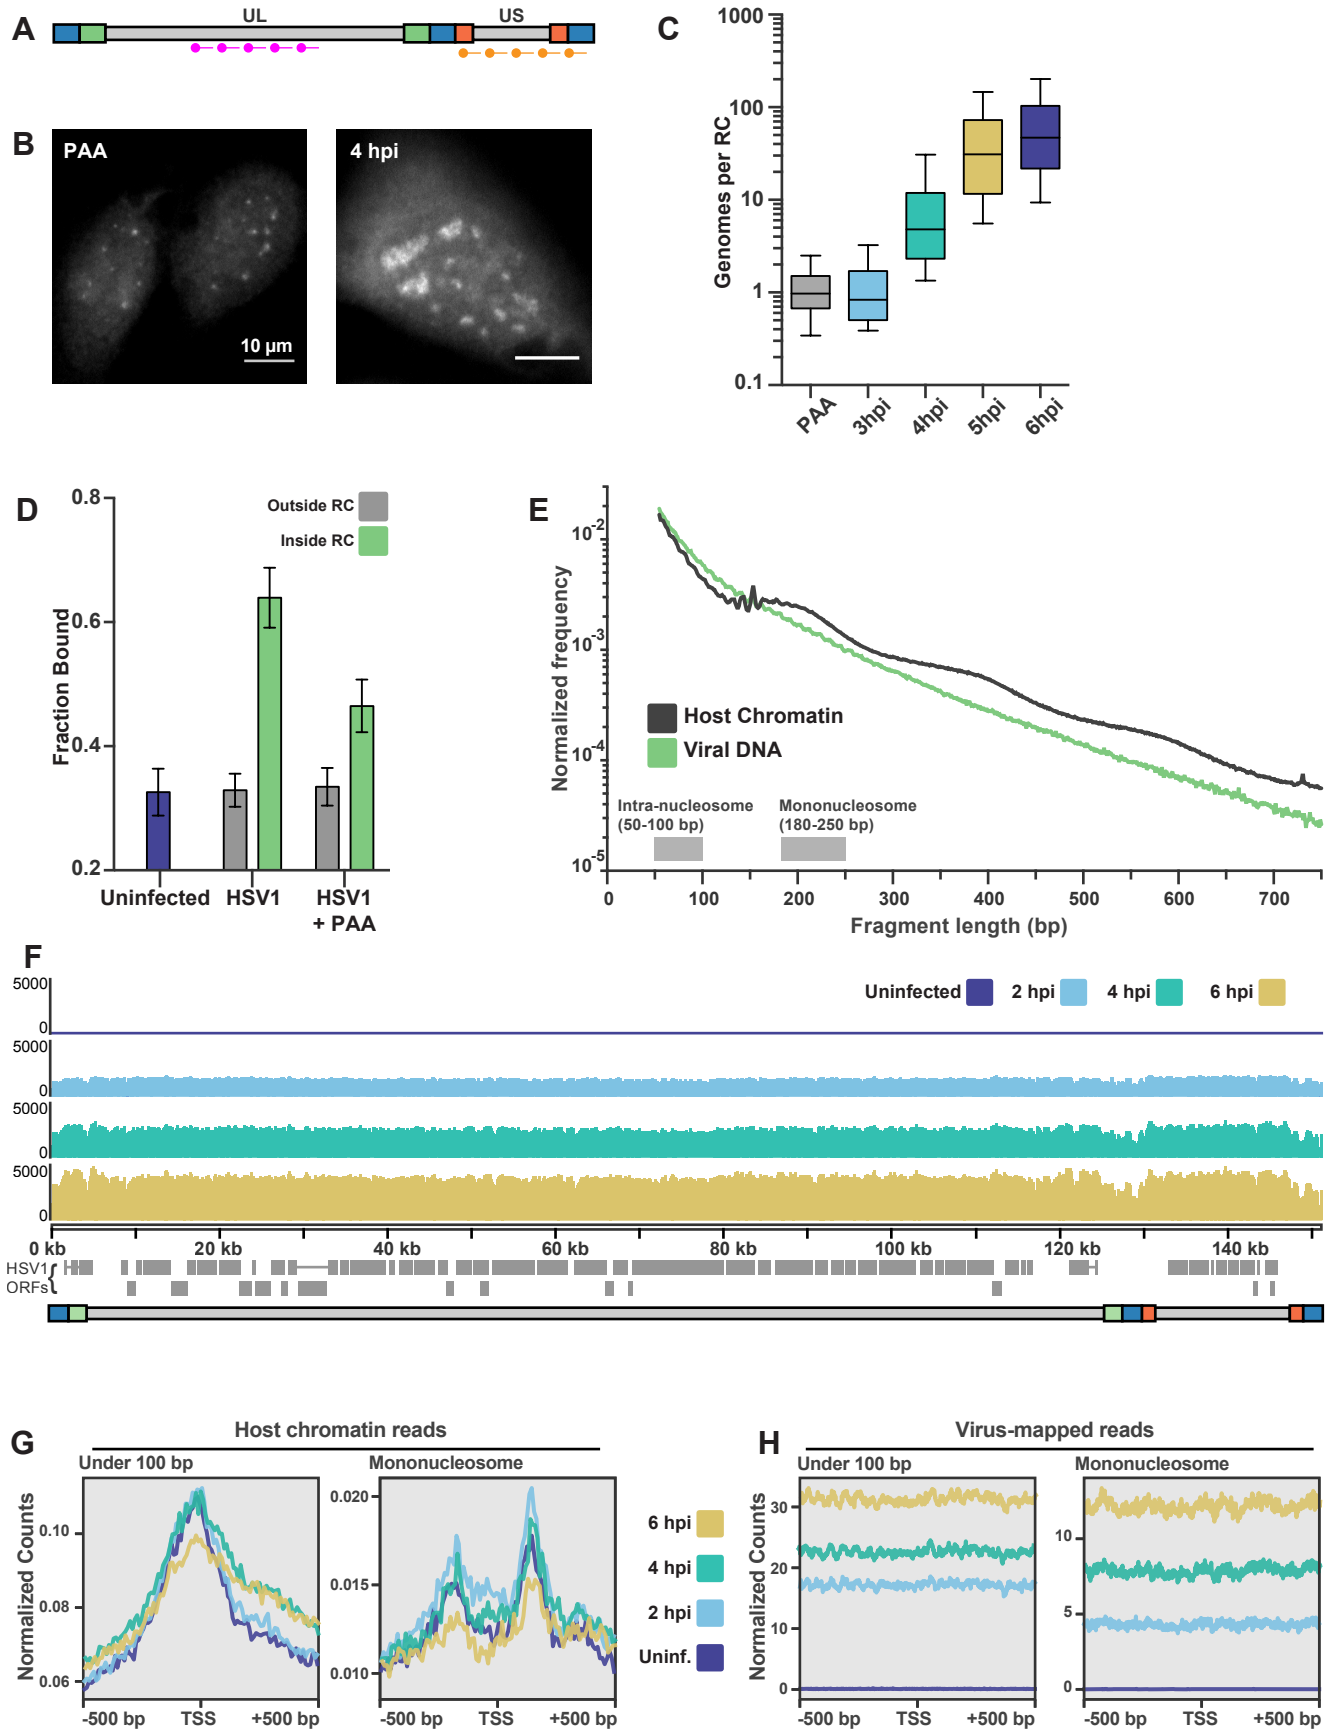



## Figure 5

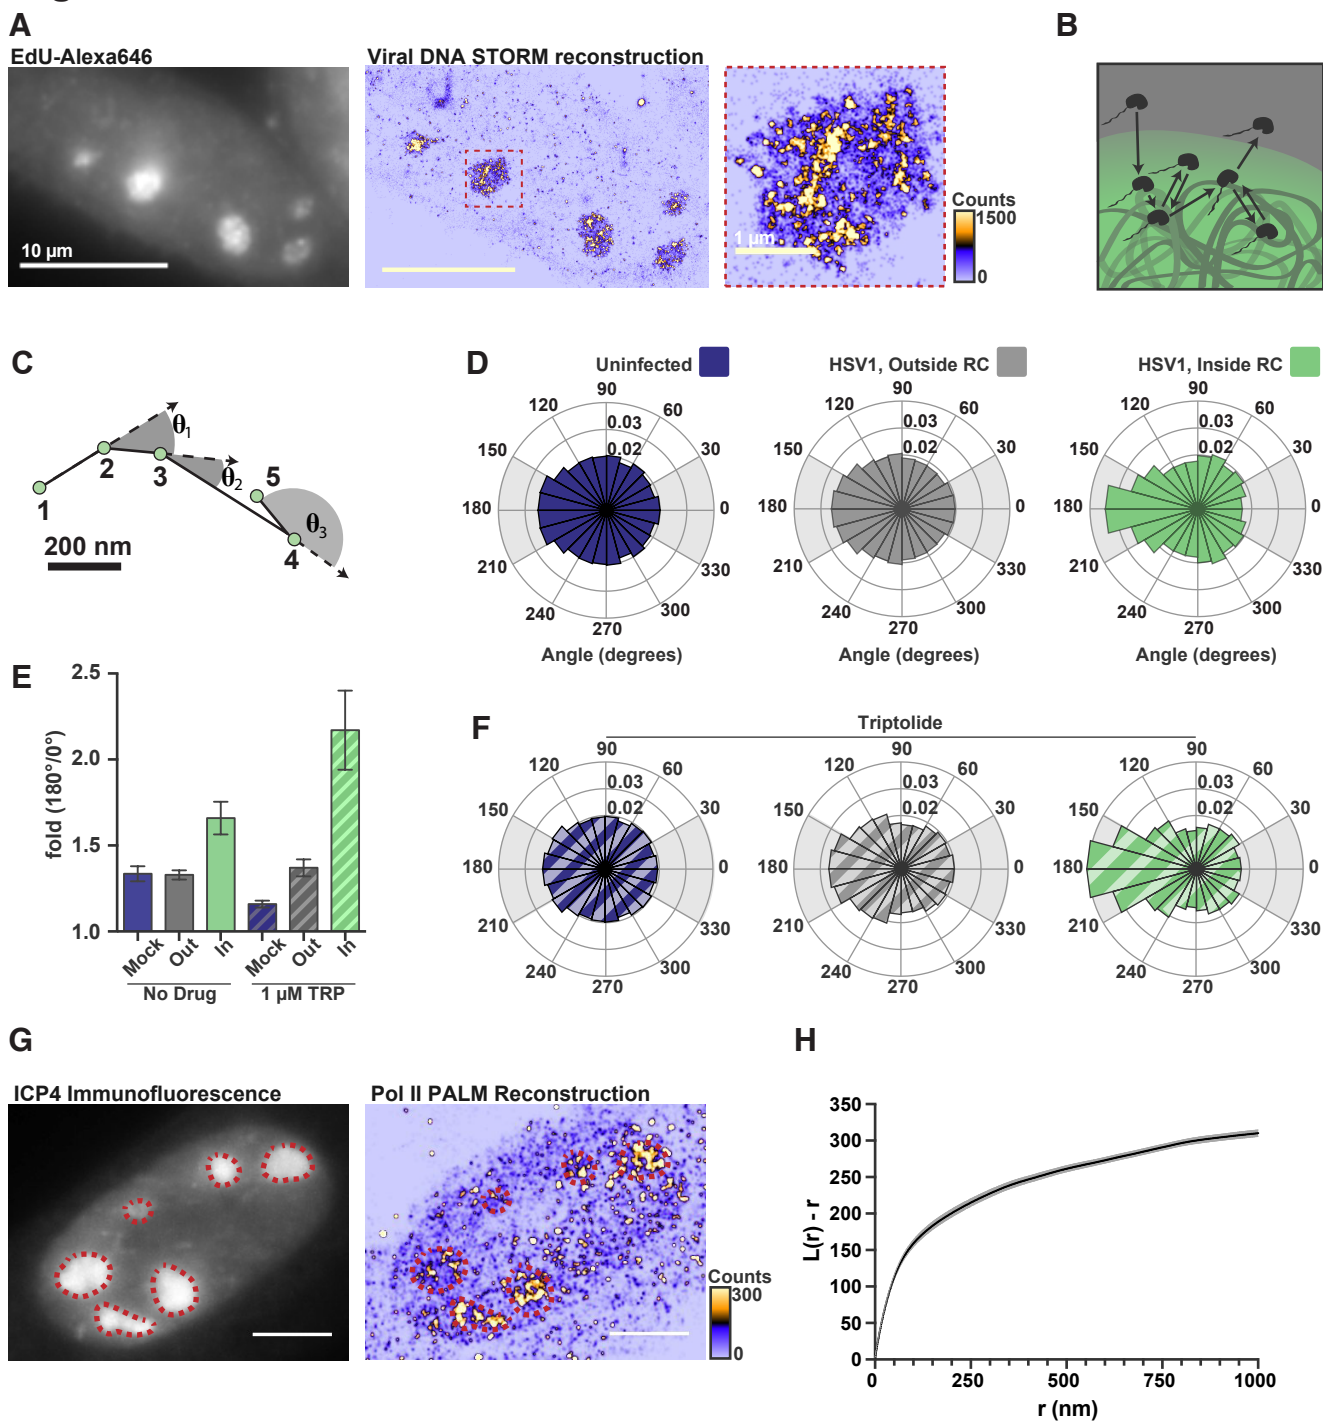

## Figure 6

A

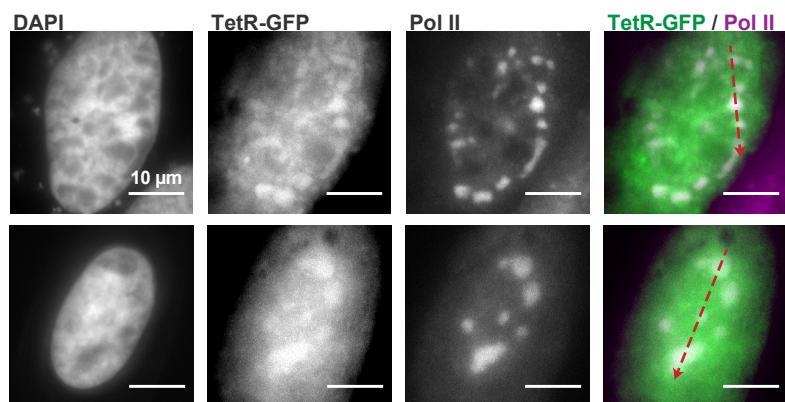

B

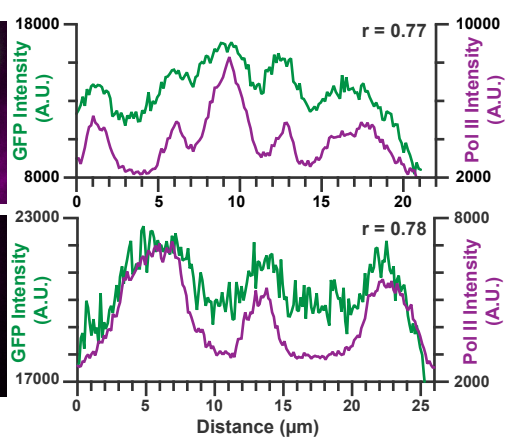

## Figure 7

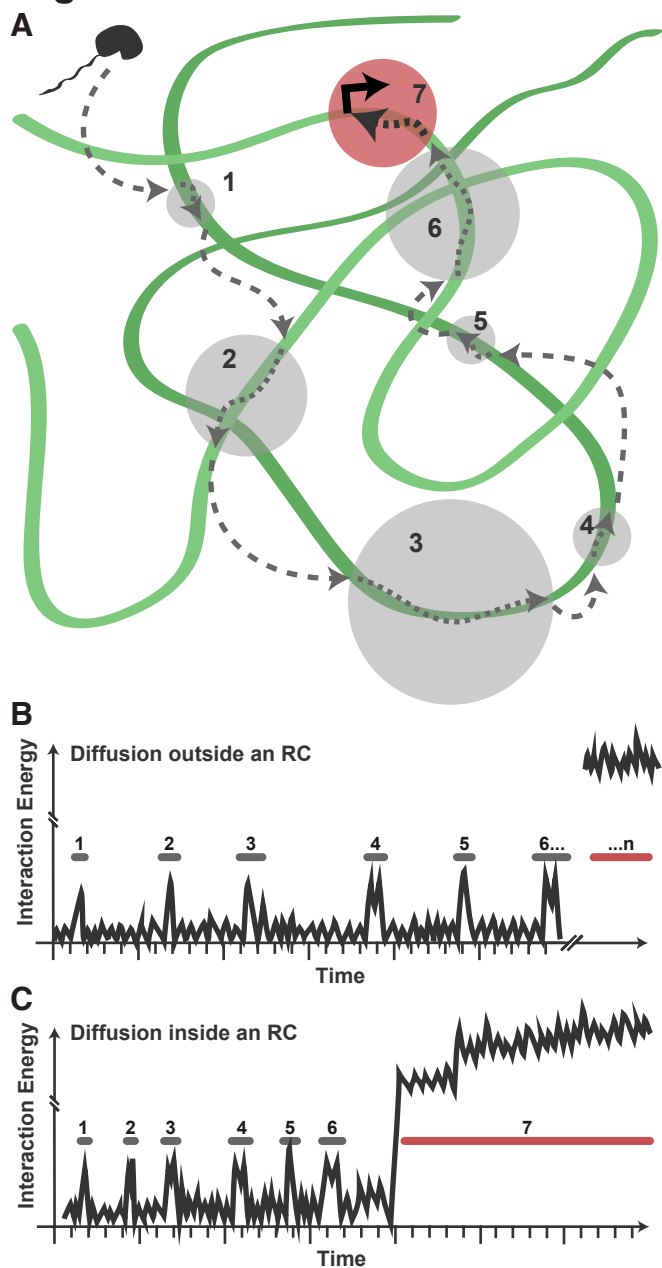

## Figure S1

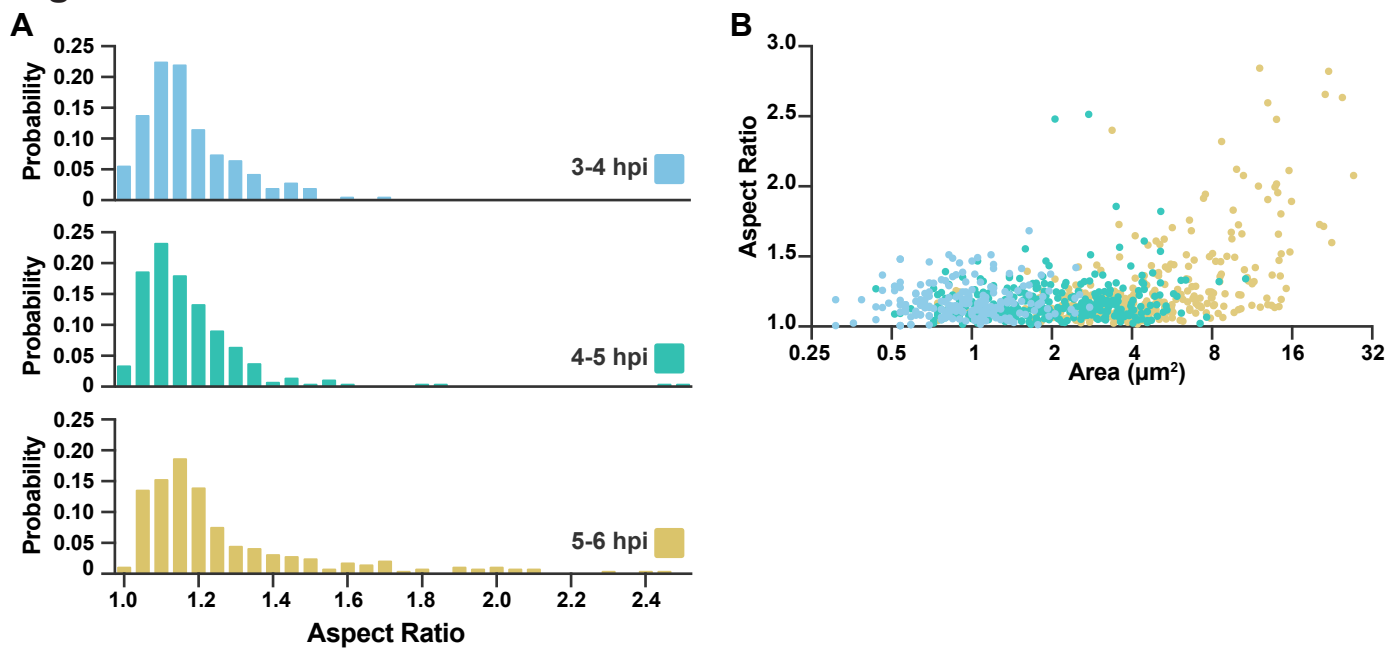

## Figure S2

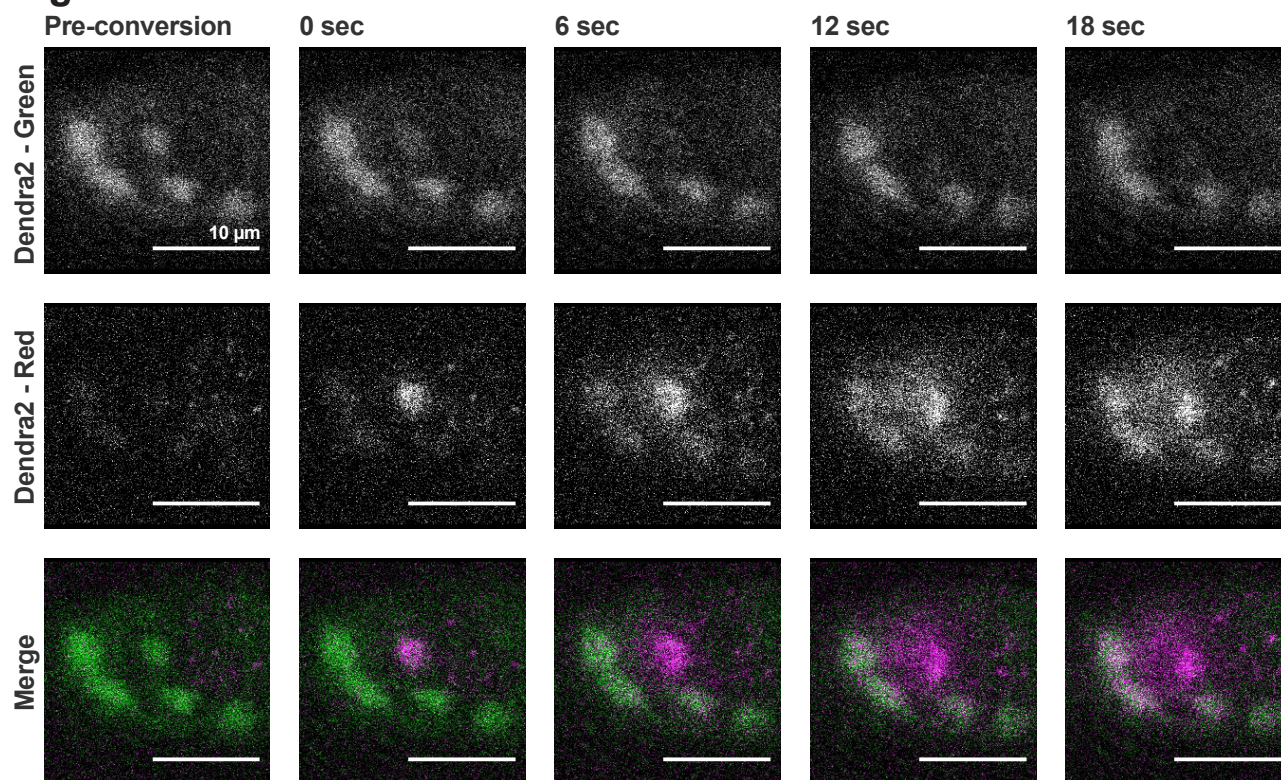



## Figure S3

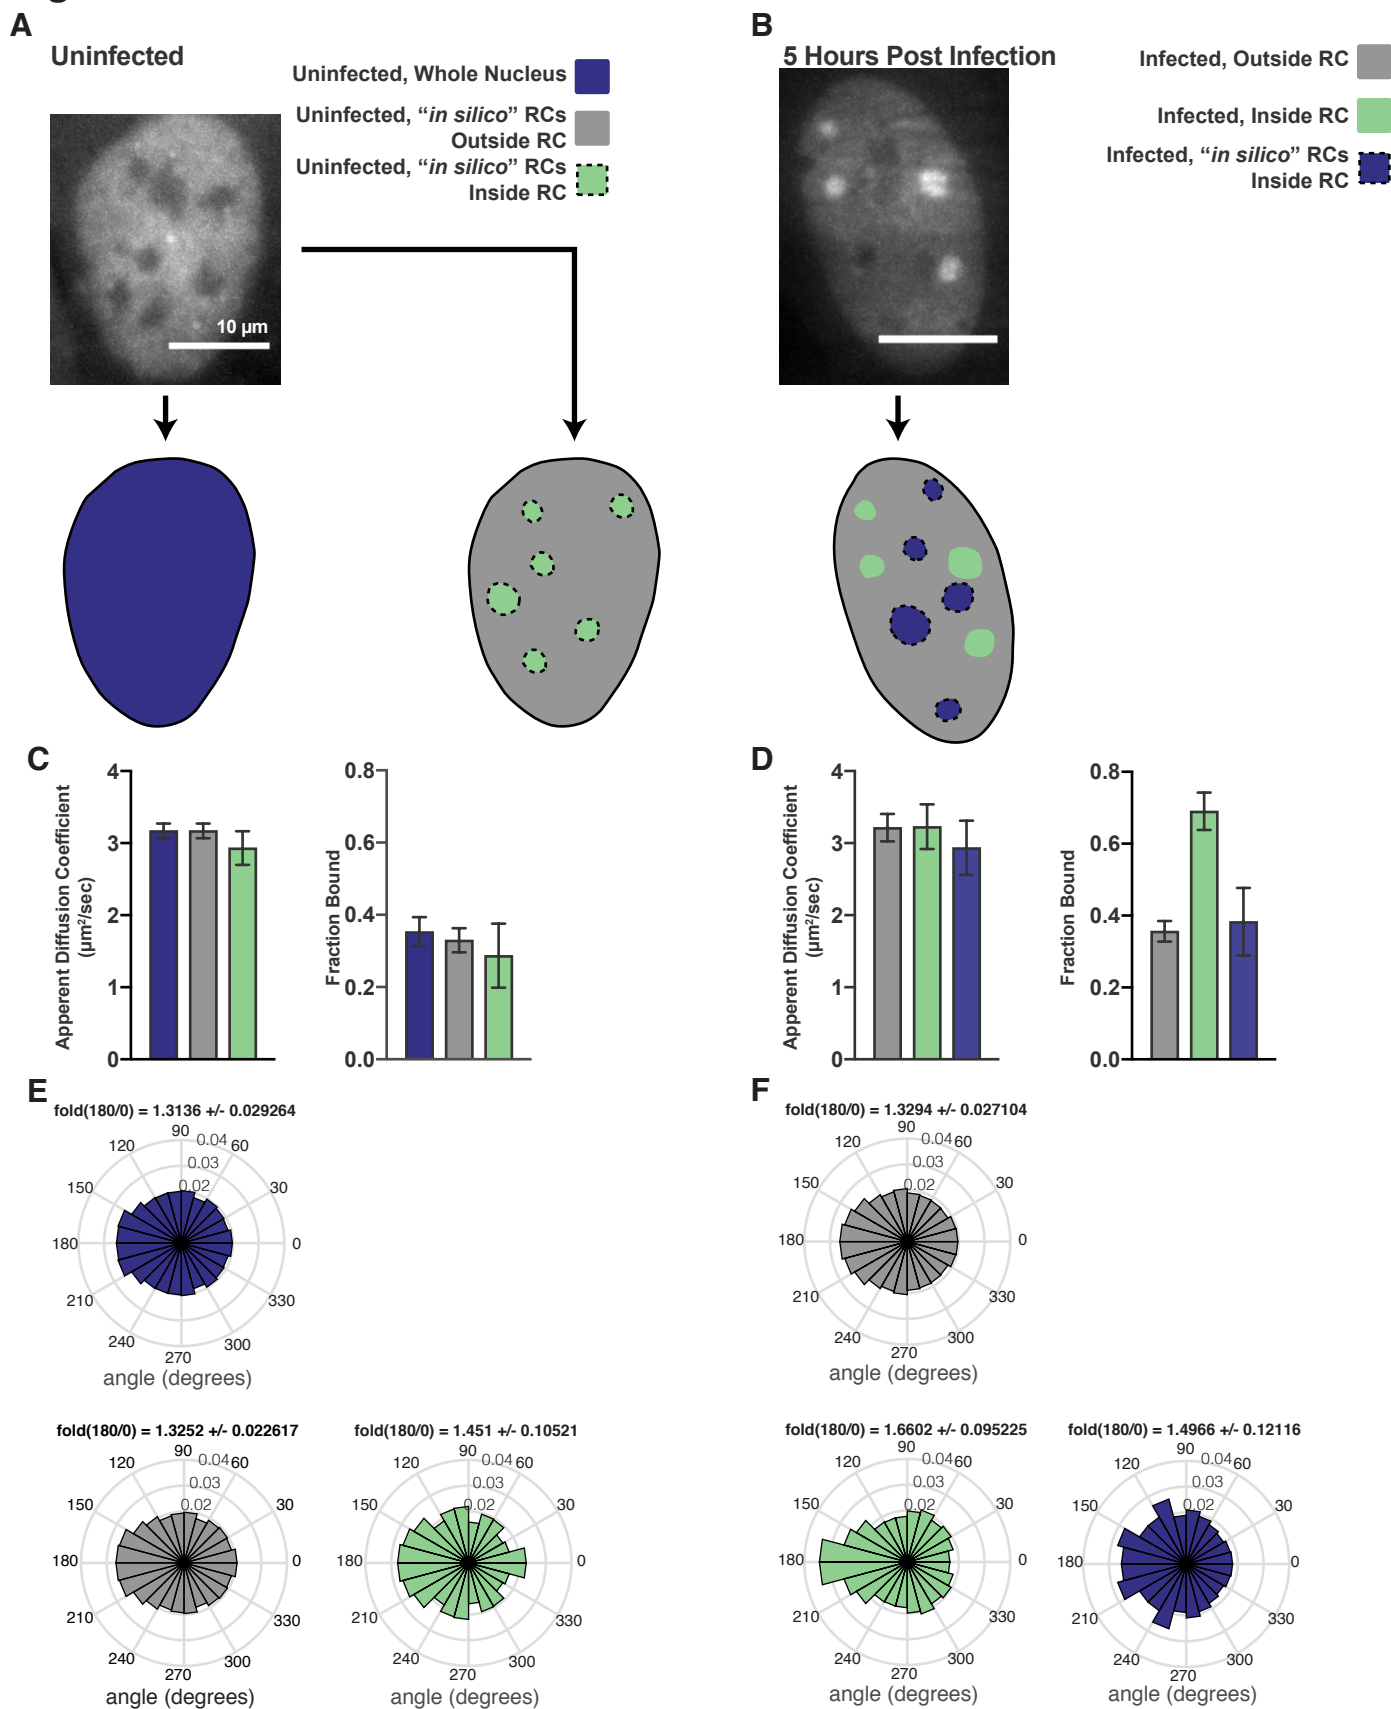

## Figure S4

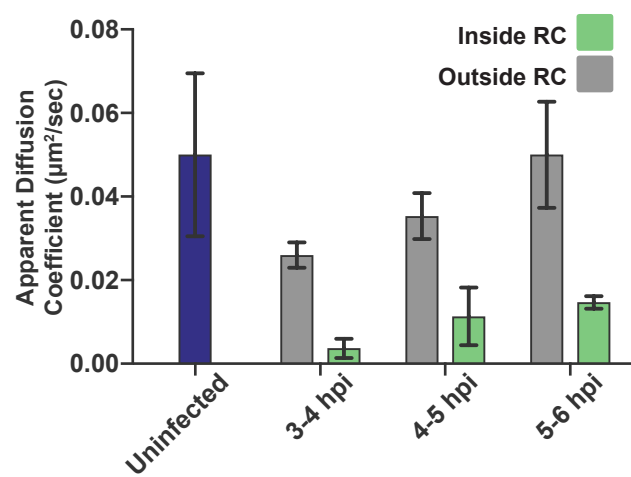

## Figure S5

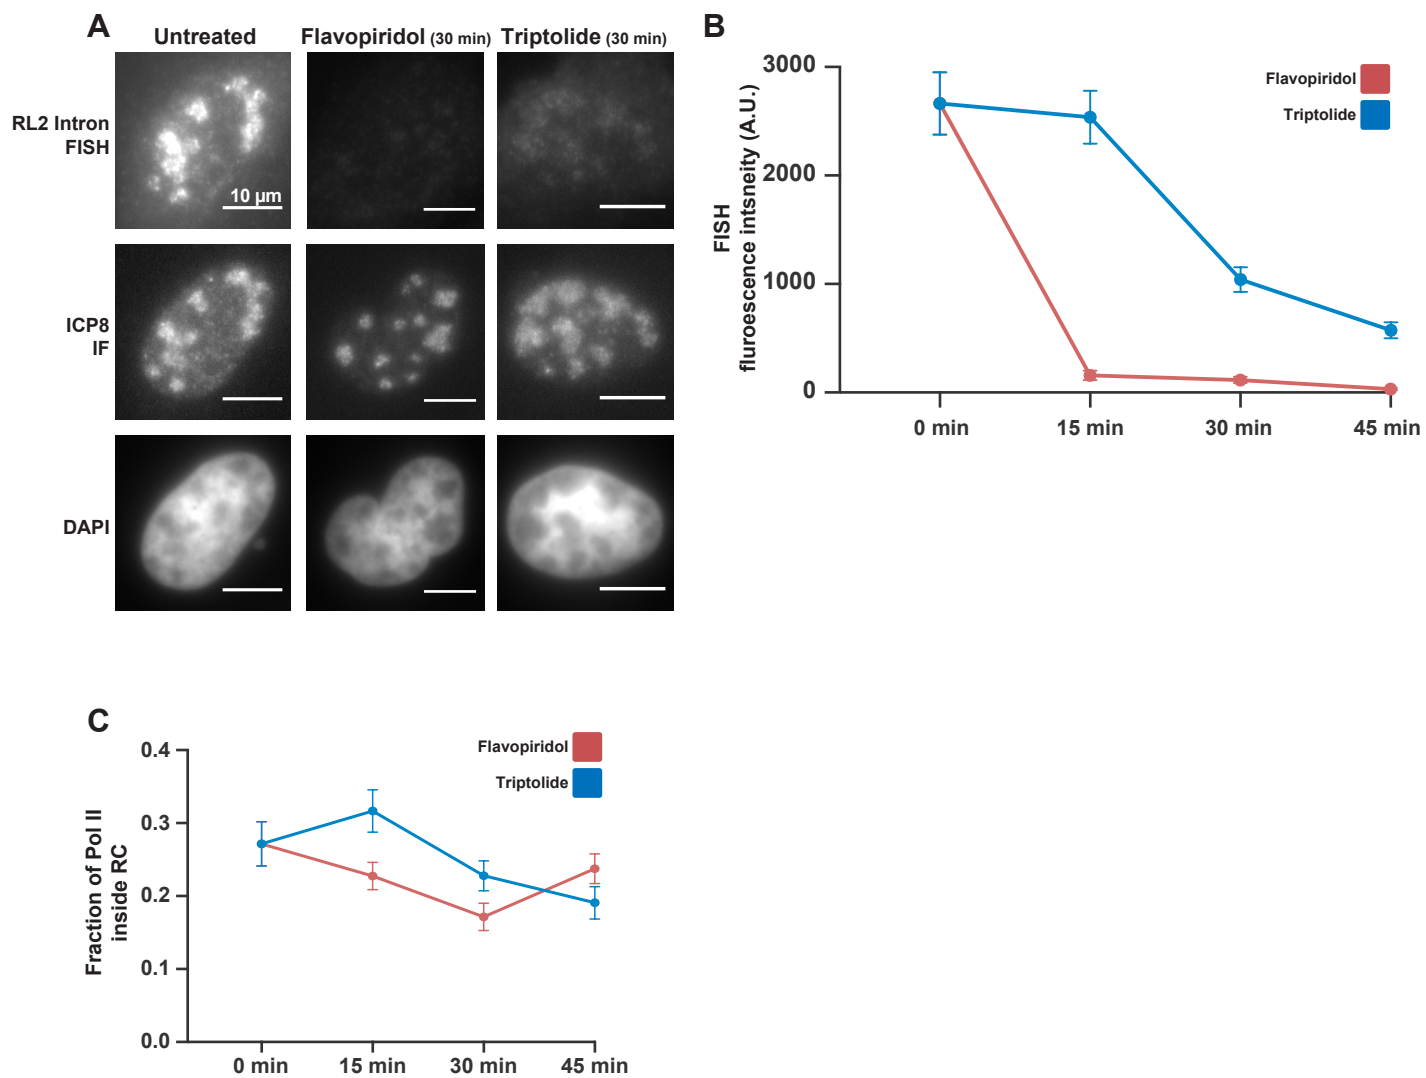

**Figure S6**

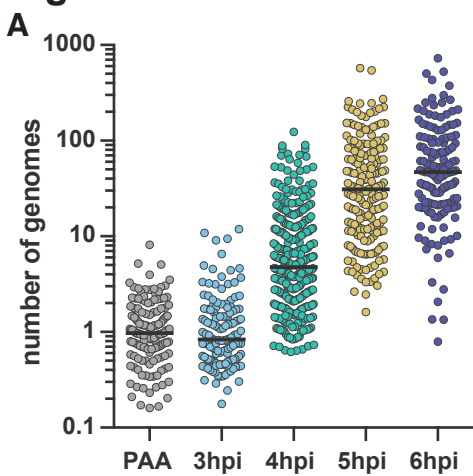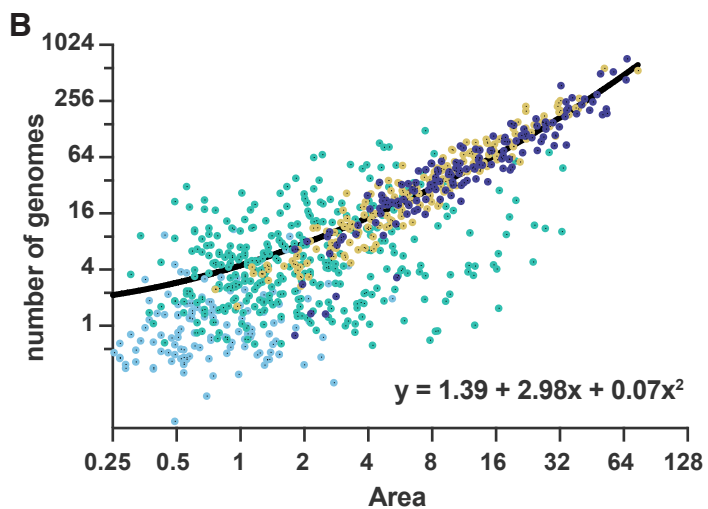

## Figure S7

Human-mapped reads ■ HSV1-mapped reads ■

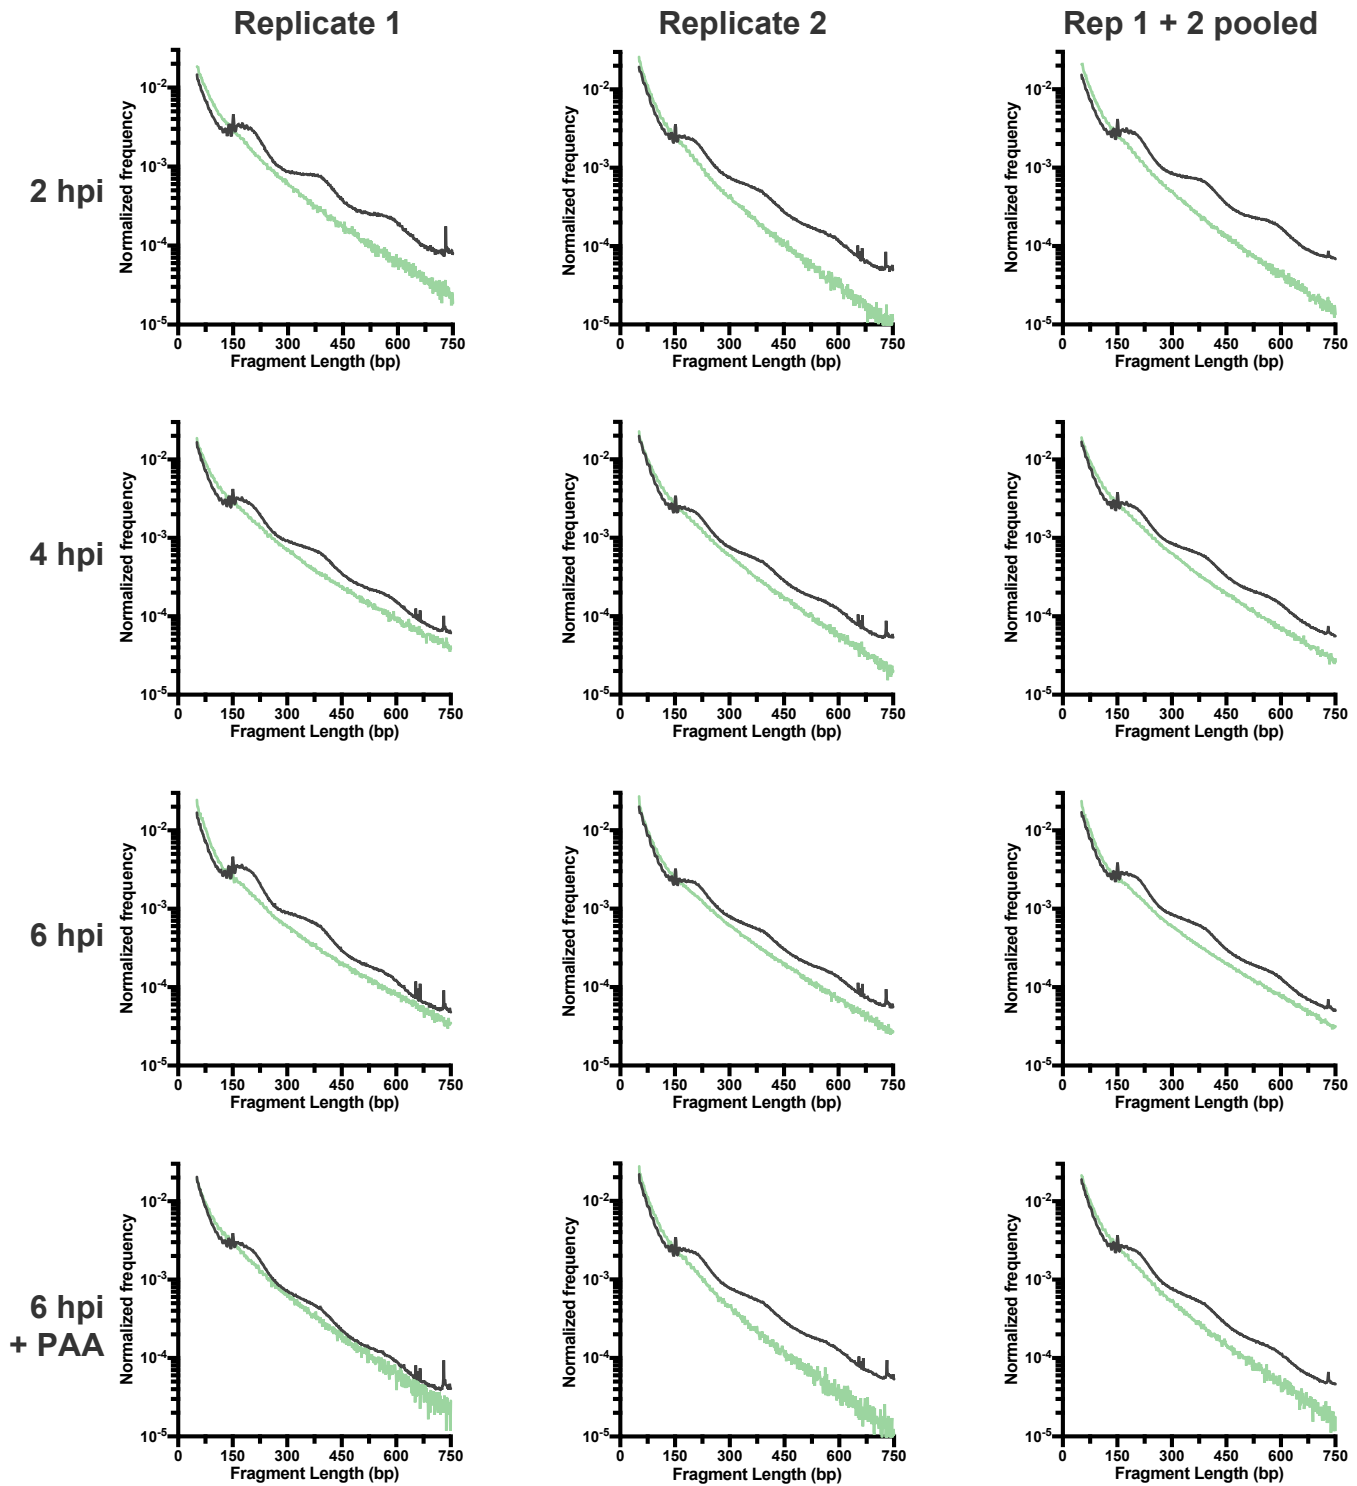



## Figure S8

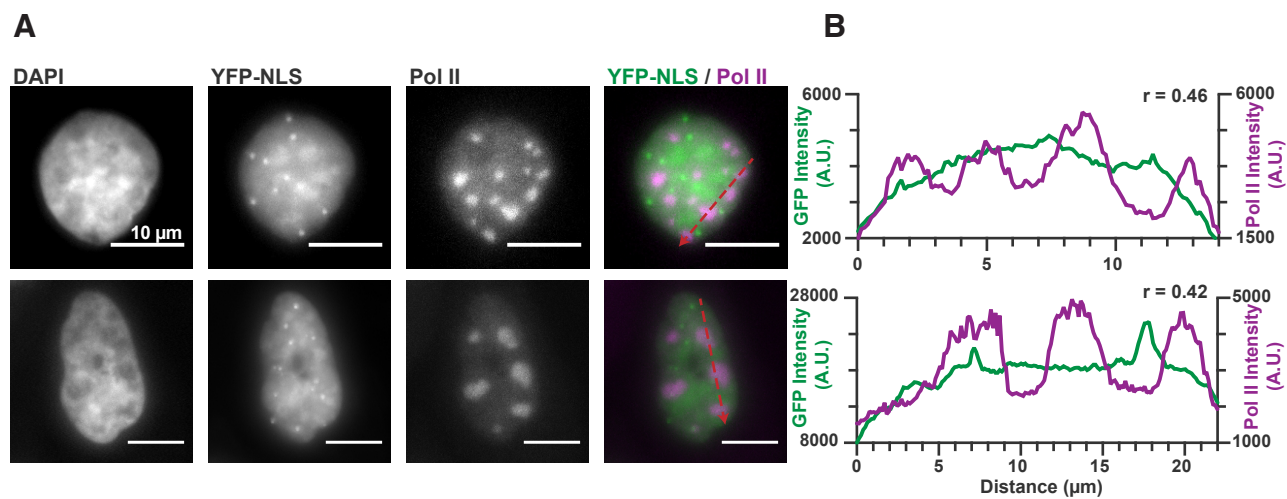

**Table S1**

| gene name | function                 | Class    | Protein Length | Region Start | Region End | IDR Length |
|-----------|--------------------------|----------|----------------|--------------|------------|------------|
| RS1       | transcription regulation | alpha    | 1294           | 0            | 79         | 79         |
|           |                          |          |                | 94           | 273        | 179        |
|           |                          |          |                | 594          | 615        | 21         |
|           |                          |          |                | 717          | 820        | 103        |
|           |                          |          |                | 884          | 893        | 9          |
|           |                          |          |                | 1214         | 1236       | 22         |
|           |                          |          |                | 1276         | 1294       | 18         |
| US12      | transcription regulation | alpha    | 88             | 35           | 88         | 53         |
| US11      | tegument                 | tegument | 149            | 0            | 149        | 149        |
| US10      | tegument                 | tegument | 300            | 23           | 92         | 69         |
|           |                          |          |                | 124          | 156        | 32         |
| US9       | membrane/glycoprotein    | beta     | 57             | 0            | 16         | 16         |
|           |                          |          |                | 54           | 57         | 3          |
| US8       | membrane/glycoprotein    | beta     | 190            | 0            | 5          | 5          |
|           |                          |          |                | 31           | 104        | 73         |
|           |                          |          |                | 172          | 190        | 18         |
| US8A      | membrane/glycoprotein    | beta     | 550            | 161          | 215        | 54         |
|           |                          |          |                | 392          | 410        | 18         |
|           |                          |          |                | 480          | 550        | 70         |
| US7       | membrane/glycoprotein    | beta     | 383            | 195          | 253        | 58         |
|           |                          |          |                | 325          | 383        | 58         |
| US6       | membrane/glycoprotein    | beta     | 394            | 277          | 319        | 42         |
|           |                          |          |                | 381          | 394        | 13         |
| US4       | membrane/glycoprotein    | gamma    | 239            | 33           | 170        | 137        |
| US3       | kinase/phosphatase       | beta     | 481            | 19           | 170        | 151        |
| US2       | unknown                  | gamma    | 291            | 254          | 291        | 37         |
| US1.5     | unknown                  | alpha    | 250            | 0            | 10         | 10         |
|           |                          |          |                | 137          | 212        | 75         |
| US1       | replication              | alpha    | 420            | 0            | 14         | 14         |
|           |                          |          |                | 15           | 181        | 166        |
|           |                          |          |                | 307          | 382        | 75         |
| ICP0      | transcription regulation | alpha    | 776            | 0            | 106        | 106        |
|           |                          |          |                | 222          | 568        | 346        |
|           |                          |          |                | 595          | 628        | 33         |
|           |                          |          |                | 761          | 776        | 15         |
| UL56      | membrane/glycoprotein    | beta     | 234            | 0            | 101        | 101        |
|           |                          |          |                | 151          | 187        | 36         |
| UL55      | unknown                  | beta     | 186            | 179          | 186        | 7          |
| UL54      | transcription regulation | alpha    | 512            | 0            | 243        | 243        |
| UL52      | replication              | beta     | 1058           | 0            | 12         | 12         |
|           |                          |          |                | 380          | 389        | 9          |
|           |                          |          |                | 480          | 497        | 17         |
|           |                          |          |                | 699          | 735        | 36         |
|           |                          |          |                | 1055         | 1058       | 3          |
| UL51      | tegument                 | tegument | 244            | 180          | 244        | 64         |
| UL50      | replication              | beta     | 371            | 0            | 7          | 7          |
|           |                          |          |                | 155          | 159        | 4          |
|           |                          |          |                | 333          | 371        | 38         |
| UL49A     | membrane/glycoprotein    | beta     | 91             | 29           | 44         | 15         |
| UL49      | tegument                 | tegument | 301            | 0            | 181        | 181        |
|           |                          |          |                | 270          | 301        | 31         |
| UL48      | transcription regulation | gamma    | 490            | 0            | 46         | 46         |
|           |                          |          |                | 454          | 456        | 2          |
|           |                          |          |                | 487          | 490        | 3          |

|      |                       |          |      |      |      |     |
|------|-----------------------|----------|------|------|------|-----|
| UL47 | tegument              | tegument | 693  | 0    | 26   | 26  |
|      |                       |          |      | 51   | 125  | 74  |
|      |                       |          |      | 150  | 180  | 30  |
|      |                       |          |      | 680  | 693  | 13  |
| UL46 | tegument              | tegument | 719  | 0    | 8    | 8   |
|      |                       |          |      | 435  | 540  | 105 |
|      |                       |          |      | 561  | 606  | 45  |
|      |                       |          |      | 667  | 694  | 27  |
|      |                       |          |      | 706  | 719  | 13  |
| UL45 | membrane/glycoprotein | gamma    | 172  | 0    | 10   | 10  |
| UL44 | membrane/glycoprotein | gamma    | 511  | 39   | 125  | 86  |
|      |                       |          |      | 314  | 330  | 16  |
| UL43 | membrane/glycoprotein | gamma    | 415  | 0    | 17   | 17  |
|      |                       |          |      | 218  | 255  | 37  |
| UL42 | replication           | beta     | 489  | 0    | 25   | 25  |
|      |                       |          |      | 333  | 448  | 115 |
|      |                       |          |      | 477  | 488  | 11  |
|      |                       |          |      | 110  | 148  | 38  |
| UL41 | tegument              | tegument | 489  | 286  | 367  | 81  |
| UL40 | replication           | beta     | 340  | 0    | 13   | 13  |
| UL39 | replication           | beta     | 1137 | 0    | 30   | 30  |
|      |                       |          |      | 125  | 157  | 32  |
|      |                       |          |      | 176  | 309  | 133 |
| UL38 | capsid                | gamma    | 465  | 0    | 56   | 56  |
|      |                       |          |      | 70   | 85   | 15  |
|      |                       |          |      | 144  | 155  | 11  |
|      |                       |          |      | 357  | 388  | 31  |
| UL37 | tegument              | tegument | 1123 | 0    | 46   | 46  |
|      |                       |          |      | 971  | 977  | 6   |
|      |                       |          |      | 1057 | 1123 | 66  |
| UL36 | tegument              | tegument | 3136 | 0    | 22   | 22  |
|      |                       |          |      | 268  | 382  | 114 |
|      |                       |          |      | 396  | 495  | 99  |
|      |                       |          |      | 749  | 770  | 21  |
|      |                       |          |      | 948  | 971  | 23  |
|      |                       |          |      | 1254 | 1282 | 28  |
|      |                       |          |      | 1911 | 1925 | 14  |
|      |                       |          |      | 2267 | 2291 | 24  |
|      |                       |          |      | 2489 | 2534 | 45  |
|      |                       |          |      | 2553 | 2701 | 148 |
|      |                       |          |      | 2728 | 2984 | 256 |
| 3029 | 3066                  | 37       |      |      |      |     |
| UL35 | capsid                | gamma    | 112  | 0    | 10   | 10  |
|      |                       |          |      | 40   | 46   | 6   |
|      |                       |          |      | 103  | 112  | 9   |
| UL34 | membrane/glycoprotein | gamma    | 275  | 0    | 11   | 11  |
| UL33 | packaging             | gamma    | 130  | 0    | 14   | 14  |
| UL32 | packaging             | gamma    | 596  | 0    | 5    | 5   |
|      |                       |          |      | 77   | 107  | 30  |
|      |                       |          |      | 227  | 237  | 10  |
| UL31 | other                 | gamma    | 306  | 0    | 41   | 41  |
| UL30 | replication           | beta     | 1235 | 0    | 16   | 16  |
|      |                       |          |      | 50   | 61   | 11  |
|      |                       |          |      | 644  | 693  | 49  |
|      |                       |          |      | 1099 | 1134 | 35  |
|      |                       |          |      | 1233 | 1235 | 2   |
| UL29 | replication           | beta     | 1196 | 0    | 8    | 8   |
|      |                       |          |      | 288  | 307  | 19  |
|      |                       |          |      | 1158 | 1196 | 38  |

|        |                          |          |      |     |     |     |
|--------|--------------------------|----------|------|-----|-----|-----|
| UL28   | packaging                | gamma    | 785  | 265 | 288 | 23  |
|        |                          |          |      | 435 | 491 | 56  |
|        |                          |          |      | 778 | 785 | 7   |
| UL27   | membrane/glycoprotein    | beta     | 904  | 45  | 99  | 54  |
|        |                          |          |      | 469 | 492 | 23  |
|        |                          |          |      | 819 | 836 | 17  |
|        |                          |          |      | 881 | 904 | 23  |
| UL26.5 | capsid                   | gamma    | 329  | 0   | 15  | 15  |
|        |                          |          |      | 108 | 171 | 63  |
|        |                          |          |      | 211 | 295 | 84  |
| UL26   | capsid                   | gamma    | 635  | 0   | 11  | 11  |
|        |                          |          |      | 270 | 318 | 48  |
|        |                          |          |      | 414 | 477 | 63  |
|        |                          |          |      | 517 | 601 | 84  |
| UL25   | packaging                | gamma    | 580  | 108 | 132 | 24  |
| UL24   | unknown                  | gamma    | 269  | 0   | 3   | 3   |
|        |                          |          |      | 190 | 242 | 52  |
|        |                          |          |      | 265 | 269 | 4   |
| UL23   | replication              | beta     | 376  | 0   | 41  | 41  |
|        |                          |          |      | 263 | 280 | 17  |
|        |                          |          |      | 371 | 376 | 5   |
| UL22   | membrane/glycoprotein    | gamma    | 838  | 175 | 210 | 35  |
|        |                          |          |      | 293 | 317 | 24  |
| UL21   | tegument                 | tegument | 535  | 206 | 231 | 25  |
|        |                          |          |      | 246 | 277 | 31  |
| UL20   | membrane/glycoprotein    | gamma    | 222  | 0   | 10  | 10  |
| UL19   | capsid                   | gamma    | 1374 | 0   | 7   | 7   |
| UL18   | capsid                   | gamma    | 318  | 0   | 2   | 2   |
| UL17   | packaging                | gamma    | 703  | 202 | 250 | 48  |
| UL16   | tegument                 | tegument | 373  | 0   | 32  | 32  |
|        |                          |          |      | 373 | 154 | 175 |
| UL15   | packaging                | gamma    | 735  | 0   | 3   | 3   |
| UL14   | tegument                 | tegument | 219  | 0   | 7   | 7   |
|        |                          |          |      | 164 | 219 | 55  |
| UL13   | tegument                 | tegument | 518  | 0   | 115 | 115 |
| UL12   | replication              | beta     | 626  | 0   | 125 | 125 |
|        |                          |          |      | 603 | 626 | 23  |
| UL11   | tegument                 | tegument | 96   | 48  | 96  | 48  |
| UL10   | membrane/glycoprotein    | gamma    | 473  | 0   | 14  | 14  |
|        |                          |          |      | 366 | 427 | 61  |
|        |                          |          |      | 444 | 473 | 29  |
| UL9    | replication              | beta     | 851  | 0   | 19  | 19  |
|        |                          |          |      | 263 | 283 | 20  |
| UL7    | tegument                 | tegument | 296  | 0   | 6   | 6   |
| UL6    | capsid                   | gamma    | 676  | 0   | 17  | 17  |
|        |                          |          |      | 384 | 401 | 17  |
|        |                          |          |      | 629 | 676 | 47  |
| UL5    | replication              | beta     | 882  | 0   | 34  | 34  |
|        |                          |          |      | 602 | 629 | 27  |
| UL4    | unknown                  | gamma    | 199  | 149 | 160 | 11  |
| UL3    | unknown                  | gamma    | 235  | 42  | 88  | 46  |
|        |                          |          |      | 144 | 158 | 14  |
|        |                          |          |      | 233 | 235 | 2   |
| UL2    | DNA repair               | beta     | 334  | 0   | 94  | 94  |
| UL1    | membrane/glycoprotein    | gamma    | 224  | 164 | 224 | 60  |
| RL1    | transcription regulation | late     | 240  | 0   | 130 | 130 |
|        |                          |          |      | 144 | 168 | 24  |
|        |                          |          |      | 236 | 240 | 4   |

**Table S2**

| Protein      | Organism <sup>a</sup> | Protein Length (AA) | Total IDR length (AA) | IDR Fraction | Reference <sup>b</sup>         |                     |
|--------------|-----------------------|---------------------|-----------------------|--------------|--------------------------------|---------------------|
| FUS          | Hs                    | 526                 | 397                   | 0.75475285   | Chong et al., 2018             |                     |
| Taf15        | Hs                    | 592                 | 274                   | 0.46283784   |                                |                     |
| EWS          | Hs                    | 656                 | 420                   | 0.6402439    |                                |                     |
| SP1          | Hs                    | 785                 | 220                   | 0.28025478   |                                |                     |
| Huntingtin   | Hs                    | 3142                | 311                   | 0.09898154   | Bergeron-Sandoval et al., 2016 |                     |
| PML          | Hs                    | 882                 | 145                   | 0.16439909   |                                |                     |
| PGL-1        | Ce                    | 730                 | 94                    | 0.12876712   |                                |                     |
| RPB1         | Hs                    | 1970                | 119                   | 0.06040609   | Boehning et al., 2018          |                     |
| DDX4         | Hs                    | 724                 | 144                   | 0.19889503   | Courchaine et al., 2016        |                     |
| eIF4GII      | Sc                    | 907                 | 229                   | 0.25248071   |                                |                     |
| Fibrillarlin | Hs                    | 321                 | 89                    | 0.27725857   |                                |                     |
| hnRNPA1      | Hs                    | 320                 | 48                    | 0.15         |                                |                     |
| Laf1         | Ce                    | 708                 | 232                   | 0.32768362   |                                |                     |
| Lsm4         | Sc                    | 187                 | 92                    | 0.49197861   |                                |                     |
| RBM14        | Hs                    | 669                 | 85                    | 0.12705531   |                                |                     |
| SRSF2        | Hs                    | 221                 | 135                   | 0.61085973   |                                |                     |
| TDP-43       | Hs                    | 414                 | 82                    | 0.19806763   |                                |                     |
| Tia1         | Hs                    | 386                 | 35                    | 0.09067358   |                                |                     |
| Whi3         | Ag                    | 729                 | 359                   | 0.49245542   |                                |                     |
| PUB1         | Hs                    | 453                 | 213                   | 0.47019868   |                                |                     |
| HP1a         | Dm                    | 213                 | 68                    | 0.31924883   |                                | Strom et al., 2017  |
| DAXX         | Hs                    | 740                 | 407                   | 0.55         |                                | Banani et al., 2017 |
| PGL-3        | Ce                    | 693                 | 124                   | 0.17893218   |                                |                     |
| NPM1         | Hs                    | 294                 | 125                   | 0.42517007   |                                |                     |
| hRNPAB       | Hs                    | 332                 | 93                    | 0.28012048   | Aguzzi and Altmeyer, 2016      |                     |
| hnRNPA3      | Hs                    | 378                 | 56                    | 0.14814815   |                                |                     |
| hnRNPA2B1    | Hs                    | 353                 | 41                    | 0.11614731   |                                |                     |
| hnRNPD       | Hs                    | 355                 | 40                    | 0.11267606   |                                |                     |
| hnRDL        | Hs                    | 420                 | 127                   | 0.30238095   |                                |                     |
| NUP145       | Sc                    | 1317                | 219                   | 0.16628702   | Schmidt and Görlich, 2015      |                     |

a. Organism abbreviations: Hs, Homo sapiens; Ce, Caenorhabditis elegans; Sc, Saccharomyces cerevisiae; Dm, Drosophila melanogaster; Ag, Ashbya gossypii b. May include citations within reference.



**Table S3**

| <b>Table S3</b>                | <b>Genome Size (bp)</b> | <b>Genome Copy number<sup>c</sup></b> | <b>Total DNA (bp)</b>        | <b>Percent of Total DNA<sup>c</sup></b> | <b>Concentration (bp/<math>\mu\text{m}^3</math>)<sup>d</sup></b> | <b>ATAC-seq read percentage<sup>e</sup></b> | <b>Fold enrichment over expected<sup>f</sup></b> |
|--------------------------------|-------------------------|---------------------------------------|------------------------------|-----------------------------------------|------------------------------------------------------------------|---------------------------------------------|--------------------------------------------------|
| <b>Host Genome<sup>a</sup></b> | 3.2 x10 <sup>9</sup>    | 2                                     | 6.4 x10 <sup>9</sup>         | 99.8 (± 0.2)                            | 9.4 (± 1.6) x10 <sup>6</sup>                                     | 75.8 (± 10.4)                               | 0.8 (± 0.1)                                      |
| <b>Viral DNA</b>               | 1.5 x10 <sup>5</sup>    | 82 (± 105)                            | 1.3 (± 1.6) x10 <sup>7</sup> | 0.2 (± 0.2)                             | 3.9 (± 5.8) x10 <sup>4</sup>                                     | 24.2 (± 10.4)                               | 130 (± 170)                                      |
| <b>Rel. Diff.<sup>b</sup></b>  | 2.1 x10 <sup>4</sup>    |                                       | 513 (± 658)                  |                                         | 240 (± 369)                                                      |                                             |                                                  |

All values are the Mean (± S.D.).  
a. Assuming karyotypically normal human cell; b. relative difference = Human / HSV1; c. Under experimental conditions of MOI = 1; d. Concentration assuming nucleus volume taken from Monier et al., 2000; e. based on total reads mapped from each organism, n = 3; f. Fold enrichment = ATAC-seq read percentage / Percent of Total DNA.
